# Supplementary material for: Site-specific binding of a water molecule to the sulfa drugs sulfamethoxazole and sulfisoxazole: a laser-desorption isomer-specific UV and IR study
Source: Royal Society of Chemistry journal article supplement (doi:10.1039/c7cp08579f), 2018-01-01
Supplement: c7cp08579f1.pdf [file c7cp08579f1.pdf]

## Electronic Supplementary Information

# Site-specific binding of a water molecule to the sulfa drugs sulfamethoxazole and sulfisoxazole: A laser-desorption isomer-specific UV and IR study

Thomas Uhlemann<sup>a</sup>, Sebastian Seidel<sup>a</sup>, Christian W. Müller<sup>a,b,\*</sup>

<sup>a</sup> Ruhr-Universität Bochum, Fakultät für Chemie und Biochemie, D-44780 Bochum, Germany

<sup>b</sup> Universität Siegen, Department Chemie und Biologie, D-57076 Siegen, Germany

### Table of contents

|                                                                                                                   |    |
|-------------------------------------------------------------------------------------------------------------------|----|
| Relative energies, RSM values and scaling factors of SMX and SIX conformers .....                                 | 1  |
| Relative energies, RMS values and interaction energies of the monohydrated complexes of SMX and SIX .....         | 4  |
| Quantum topological key parameters at the bond critical points of the conformers of SMX and SIX .....             | 6  |
| Potential energy scans and transition states .....                                                                | 9  |
| Molecular graphs of all calculated complexes of SMX and SIX .....                                                 | 12 |
| Tentative assignment of the R2PI spectra of SMX and SIX .....                                                     | 14 |
| Quantum topological key parameters at the bond critical points of the monohydrated complexes of SMX and SIX ..... | 15 |
| IQF results with B3LYP .....                                                                                      | 23 |
| Cartesian coordinates .....                                                                                       | 24 |

---

\*Corresponding author, *e-mail address*: christian.w.mueller@ruhr-uni-bochum.de

## Relative energies, RMS values and scaling factors of SMX and SIX conformers

Table S1: Relative energies (kcal/mol) including ZPE correction, RMS values (cm<sup>-1</sup>) representing the agreement between the scaled calculated harmonic frequencies and the experimental NH stretch frequencies and the scaling factors for the harmonic frequencies of the conformers of the two tautomers of sulfamethoxazole (left) and sulfisoxazole (right). In all cases, the basis set 6-311++G(3df,3pd) was used

| SMX         | M06-2X | B3LYP  | $\omega$ B97xD | SIX         | M06-2X    | B3LYP     | $\omega$ B97xD |
|-------------|--------|--------|----------------|-------------|-----------|-----------|----------------|
| <b>m-a1</b> | 0.00   | 0.00   | 0.00           | <b>i-a1</b> | 0.00      | 0.00      | 0.00           |
|             | 11     | 14     | 15             |             | 7         | 8         | 11             |
|             | 0.9517 | 0.9581 | 0.9468         |             | 0.9574    | 0.9578    | 0.9457         |
| m-a3        | 3.12   | 2.85   | 3.29           | i-a2        | 1.82      | 2.41      | 1.57           |
|             | 19     | 21     | 20             |             | 4         | 3         | 9              |
|             | 0.9468 | 0.9532 | 0.9421         |             | 0.9534    | 0.9601    | 0.9479         |
| m-i1        | 10.58  | 8.37   | 10.77          | i-a4        | 2.15      | not conv. | 1.81           |
|             | 12     | 3      | 12             |             | 16        |           | 22             |
|             | 0.9541 | 0.9631 | 0.9502         |             | 0.9510    |           | 0.9457         |
| m-i2        | 10.49  | 8.91   | 10.72          | i-a5        | not conv  | not conv  | not conv       |
|             | 11     | 14     | 10             | i-a6        | 2.94      |           |                |
|             | 0.9542 | 0.9609 | 0.9504         |             | 14        | not conv. | not conv.      |
| m-i3        | 13.18  | 11.05  | 13.45          |             | 0.9506    |           |                |
|             | 20     | 22     | 20             | i-a7        |           | 2.60      |                |
|             | 0.9504 | 0.9583 | 0.9454         |             | not conv. | 21        | not conv.      |
|             |        |        |                |             |           | 0.9552    |                |
|             |        |        |                | i-i1        | 14.11     | 10.76     | 14.10          |
|             |        |        |                |             | 4         | 6         | 4              |
|             |        |        |                |             | 0.9566    | 0.9646    | 0.9512         |
|             |        |        |                | i-i2        | 13.40     | 11.61     | 13.85          |
|             |        |        |                |             | 3         | 5         | 6              |
|             |        |        |                |             | 0.9556    | 0.9639    | 0.9505         |
|             |        |        |                | i-i3        | 13.80     | 11.47     | 13.99          |
|             |        |        |                |             | 7         | 9         | 3              |
|             |        |        |                |             | 0.9571    | 0.9651    | 0.9518         |
|             |        |        |                | i-i4        | 14.22     | 11.94     | 14.34          |
|             |        |        |                |             | 5         | 5         | 5              |
|             |        |        |                |             | 0.9574    | 0.9650    | 0.9521         |

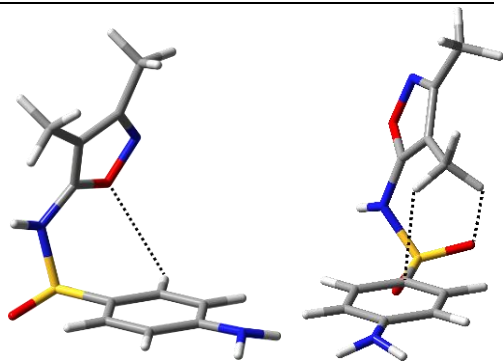

Figure S1: i-a7 (left) and i-a6 (right)

Table S2: Relative energies (kcal/mol) including ZPE correction, RMS values (cm<sup>-1</sup>) representing the agreement between the scaled calculated harmonic frequencies and the experimental NH stretch frequencies and the scaling factors for the harmonic frequencies of the conformers of the two tautomers of sulfamethoxazole using M05-2X in combination with three different basis sets

| SMX         | 6-31+G(d) | 6-311++G(d,p) | 6-311++G(3df,3pd) |
|-------------|-----------|---------------|-------------------|
| <b>m-a1</b> | 0.00      | 0.00          | 0.00              |
|             | 1         | 3             | 9                 |
|             | 0.9440    | 0.9427        | 0.9424            |
| m-a2        | 2.04      | 2.20          | not conv.         |
|             | 5         | 4             |                   |
|             | 0.9455    | 0.9440        |                   |
| m-a3        | 3.52      | 3.65          | 3.38              |
|             | 21        | 20            | 20                |
|             | 0.9391    | 0.9382        | 0.9376            |
| m-i1        | 10.31     | 9.64          | 9.92              |
|             | 7         | 2             | 9                 |
|             | 0.9456    | 0.9458        | 0.9450            |
| m-i2        | 10.59     | 9.99          | 9.90              |
|             | 13        | 3             | 9                 |
|             | 0.9450    | 0.9449        | 0.9450            |
| m-i3        | 12.98     | 12.55         | 12.60             |
|             | 22        | 22            | 21                |
|             | 0.9407    | 0.9398        | 0.9402            |
| m-i4        |           | 12.79         | 12.93             |
|             | not conv. | 21            | 21                |
|             |           | 0.9396        | 0.9400            |

Table S3: Relative energies (kcal/mol) including ZPE correction, RMS values (cm<sup>-1</sup>) representing the agreement between the scaled calculated harmonic frequencies and the experimental NH stretch frequencies and the scaling factors for the harmonic frequencies of the conformers of the two tautomers of sulfisoxazole using M05-2X in combination with three different basis sets

| SIX         | 6-31+G(d) | 6-311++G(d,p) | 6-311++G(3df,3pd) |
|-------------|-----------|---------------|-------------------|
| <b>i-a1</b> | 0.00      | 0.00          | 0.00              |
|             | 2         | 5             | 5                 |
| i-a2        | 0.9434    | 0.9415        | 0.9415            |
|             | 1.66      | 1.91          | 1.98              |
| i-a3        | 10        | 10            | 3                 |
|             | 0.9464    | 0.9447        | 0.9442            |
| i-a4        | 2.19      | 2.59          |                   |
|             | 2         | 4             | not conv.         |
| i-a5        | 0.9427    | 0.9410        |                   |
|             | 2.79      | 3.15          | 2.62              |
| i-i1        | 12        | 11            | 16                |
|             | 0.9435    | 0.9417        | 0.9417            |
| i-i2        | 3.40      | 3.68          | 4.10              |
|             | 13        | 12            | 6                 |
| i-i3        | 0.9461    | 0.9442        | 0.9442            |
|             | 14.55     | 14.24         | 13.63             |
| i-i4        | 1         | 4             | 1                 |
|             | 0.9473    | 0.9459        | 0.9465            |
| i-i5        | 14.74     | 14.35         | 13.27             |
|             | 2         | 2             | 3                 |
| i-i6        | 0.9466    | 0.9449        | 0.9456            |
|             | 14.62     | 14.49         | 13.52             |
| i-i7        | 5         | 8             | 2                 |
|             | 0.9479    | 0.9466        | 0.9469            |
| i-i8        | 15.16     | 14.91         | 13.93             |
|             | 2         | 5             | 0                 |
|             | 0.9483    | 0.9469        | 0.9470            |

Table S4: Relative energies (kcal mol<sup>-1</sup>) of SMX and SIX conformers calculated at different non-DFT levels of theory. All energies are given without zero-point energy correction. Turbomole<sup>1</sup> was used for the RICC2 calculations

|             | $\Delta E^a$        | $\Delta E^a$        | $\Delta E$            |
|-------------|---------------------|---------------------|-----------------------|
|             | MP2/6-311++G(d,p)   | sos-RICC2/TZVPP     | sos-RICC2/TZVPP       |
|             | single-point energy | single-point energy | geometry optimization |
| <i>SMX</i>  |                     |                     |                       |
| <b>m-a1</b> | 0.00                | 0.00                | 0.00                  |
| <b>m-a2</b> | 2.69                | 2.06                | 2.11                  |
| <b>m-a3</b> | 5.08                | 3.75                | 3.73                  |
| <i>SIX</i>  |                     |                     |                       |
| <b>i-a1</b> | 0.00                | 0.00                | 0.00                  |
| <b>i-a2</b> | 1.59                | 1.96                | 1.95                  |
| <b>i-a3</b> | 3.66                | 2.98                | 2.80                  |

<sup>a</sup> Single-point energies on the M05-2X/6-311++G(d,p) equilibrium geometries.

Table S5: Dihedral angles  $\omega$ ,  $\theta$ , and  $\tau$  of the SMX conformer **m-a1** and the four SMX crystal polymorphs. The dihedral angles are defined in Fig. 1 of the main text

|                              | $\omega$ | $\theta$ | $\tau$ |
|------------------------------|----------|----------|--------|
| SMX <b>m-a1</b>              | -86.4    | -60.5    | 134.4  |
| polymorph I <sup>2,a</sup>   | -76.6    | -56.1    | 140.8  |
| polymorph II <sup>2,b</sup>  | -78.6    | -61.6    | 150.8  |
| polymorph III <sup>3,c</sup> | -70.3    | -61.1    | 152.4  |
| polymorph IV <sup>3,d</sup>  | -72.7    | -65.7    | 161.6  |

CSD Refcodes: <sup>a</sup>SLFNMB01, <sup>b</sup>SLFNMB02, <sup>c</sup>SLFNMB05, <sup>d</sup>SLFNMB06.

## Relative energies, RMS values and interaction energies of the monohydrated complexes of SMX and SIX

Table S6: BSSE and ZPE-corrected relative energies, RMS values (cm<sup>-1</sup>) and scaling factors for the harmonic frequencies, sum of intermolecular EML energies, and complexation energies (kcal/mol) of the monohydrated complexes of sulfamethoxazole. The complexation energies are given in parentheses (raw/corrected). mid = 6-311++G(d,p); big = 6-311++G(3df,3pd). Not conv. = converged to different structure during geometry optimization

|               | M05-2X                                                        |                                                              |                                                       | M06-2X                                                         |                                                              | B3LYP                                                        |                                                            | ωB97xD                                                  |                                                     |
|---------------|---------------------------------------------------------------|--------------------------------------------------------------|-------------------------------------------------------|----------------------------------------------------------------|--------------------------------------------------------------|--------------------------------------------------------------|------------------------------------------------------------|---------------------------------------------------------|-----------------------------------------------------|
|               | mid                                                           | big                                                          | big*                                                  | mid                                                            | big                                                          | mid                                                          | big                                                        | mid                                                     | big                                                 |
| <b>m-a1wa</b> | 0.00, 8,<br>0.9408, -11.77<br>(-12.46/-11.39)                 | 0.00, 10,<br>0.9418, -11.83<br>(-10.79/-10.29)               | 0.00, 12,<br>0.9413<br>(-10.79/-10.31)                | 0.00, 18 <sup>a</sup> ,<br>0.9447, -12.36<br>(-12.73/-11.70)   | 0.00, 18 <sup>a</sup> ,<br>0.9465, -12.23<br>(-11.09/-10.54) | 0.00**, 11,<br>0.9605, -10.48<br>(-9.77/-8.72)               | 0.00, 13,<br>0.9616, -10.98<br>(-8.73/-8.27)               | 0.00, 17,<br>0.9445<br>(-12.69/-11.60)                  | 0.00, 16,<br>0.9463<br>(-11.11/-10.57)              |
| m-a1wb        | 0.04, 15 <sup>a</sup> ,<br>0.9376, -12.51<br>(-12.52/-11.32)  | 0.27, 14 <sup>a</sup> ,<br>0.9380, -12.61<br>(-10.63/-10.05) | 0.27, 15 <sup>a</sup> ,<br>0.9373,<br>(-10.57/-10.01) | 0.04, 25 <sup>a</sup> ,<br>0.9412, -12.92<br>(-12.69/-11.52)   | 0.22, 25 <sup>a</sup> ,<br>0.9427, -12.86<br>(-10.87/-10.24) | 0.67, 15 <sup>a</sup> ,<br>0.9547, -10.99<br>(-9.34/-8.28)   | 0.94, 14 <sup>a</sup> ,<br>0.9552, -10.70<br>(-7.87/-7.33) | 0.62, 22 <sup>a</sup> ,<br>0.9400<br>(-11.76/-10.64)    | 1.09, 18 <sup>a</sup> ,<br>0.9412<br>(-10.10/-9.48) |
| m-a1wc        | 0.82, 20 <sup>a</sup> ,<br>0.9402, -10.25<br>(-11.45/-10.17)  | not calc.                                                    | 0.66, 23 <sup>a</sup> ,<br>0.9408<br>(-10.11/-9.44)   | 0.51, 20 <sup>a</sup> ,<br>0.9437, -10.58<br>(-12.10/-10.75)   | not calc.                                                    | 0.47**, 10,<br>0.9595, -10.33<br>(-9.09/-8.08)               | not calc.                                                  | 0.68, 16 <sup>a</sup> ,<br>0.9437<br>(-11.68/-10.44)    | not calc.                                           |
| m-a3wa        | 2.78, 13,<br>0.9391, -12.55<br>(-12.94/-11.83)                | not calc.                                                    | 2.93, 23,<br>0.9382,<br>(-11.26/-10.72)               | 2.78, 19 <sup>a</sup> ,<br>0.9425, -12.74<br>(-12.96/-11.81)   | not calc.                                                    | 2.47, 9,<br>0.9572, -11.60<br>(-10.11/-9.05)                 | not calc.                                                  | 3.41, 20,<br>0.9424<br>(-12.27/-11.17)                  | not calc.                                           |
| m-a1wf        | 3.05, 57 <sup>a</sup> ,<br>0.9335, -4.18<br>(-9.97/-8.83)     | not calc.                                                    | 2.86, 58 <sup>a</sup> ,<br>0.9326<br>(-7.91/-7.40)    | 2.92, 60 <sup>a</sup> ,<br>0.9390, -6.53<br>(-10.96/-9.75)     | not calc.                                                    | not conv.                                                    | not calc.                                                  | 3.11, 57 <sup>a</sup> ,<br>0.9351<br>(-9.05/-7.94)      | not calc.                                           |
| m-a1we        | not conv.                                                     | not calc.                                                    | not calc.                                             | 2.74, 63 <sup>a</sup> ,<br>0.9373, -5.68<br>(-10.39/-9.14)     | not calc.                                                    | not conv.                                                    | not calc.                                                  | not conv.                                               | not calc.                                           |
| ‡ m-a1wg      | 3.65, 63 <sup>a</sup> ,<br>0.9341, -6.58<br>(-9.48/-8.33)     | not calc.                                                    | not calc.                                             | 3.63, 64 <sup>a</sup> ,<br>0.9382, -7.53<br>(-9.95/-8.71)      | not calc.                                                    | not conv.                                                    | not calc.                                                  | 3.84, 65 <sup>a</sup> ,<br>0.9367<br>(-9.51/-8.36)      | not calc.                                           |
| m-a1wh        | not conv.                                                     | not calc.                                                    | not calc.                                             | not conv.                                                      | not calc.                                                    | 3.67, 56 <sup>a</sup> ,<br>0.9430, -5.02<br>(-4.43/-3.88)    | not calc.                                                  | not conv.                                               | not calc.                                           |
| m-a1wd        | 2.98, 56 <sup>a</sup> ,<br>0.9259, -4.65<br>(-7.99/-6.67)     | not calc.                                                    | not calc.                                             | 2.88, 56 <sup>a</sup> ,<br>0.9303, -4.92<br>(-8.48/-7.10)      | not calc.                                                    | 4.21, 57 <sup>a</sup> ,<br>0.9420, -2.98<br>(-4.37/-3.31)    | not calc.                                                  | 3.20, 57 <sup>a</sup> ,<br>0.9274<br>(-7.91/-6.64)      | not calc.                                           |
| m-a1wi        | 5.37, 46 <sup>a</sup> ,<br>0.9309, -8.06<br>(-8.96/-7.62)     | not calc.                                                    | 5.65, 52 <sup>a</sup> ,<br>0.9307<br>(-7.55/-6.95)    | 5.68, 46 <sup>a</sup> ,<br>0.9352, -9.77<br>(-9.35/-7.93)      | not calc.                                                    | 4.44, 47 <sup>a</sup> ,<br>0.9481, -7.50<br>(-6.42/-5.51)    | not calc.                                                  | 5.93, 49 <sup>a</sup> ,<br>0.9328<br>(-8.93/-7.58)      | not calc.                                           |
| m-i3wa        | 10.94, 41 <sup>b</sup> ,<br>0.9427, -12.37<br>(-14.15/-12.83) | not calc.                                                    | 11.19, 48,<br>0.9429<br>(-12.20/-11.72)               | 11.56, 31,<br>0.9462, -12.55<br>(-14.30/-12.94)                | not calc.                                                    | 9.66, 35 <sup>b</sup> ,<br>0.9623, -11.67<br>(-11.66/-10.44) | not calc.                                                  | 11.61, 40,<br>0.9466<br>(-14.31/-12.99)                 | not calc.                                           |
| m-i3wb        | 11.08, 45 <sup>b</sup> ,<br>0.9448, -13.15<br>(-14.88/-13.71) | not calc.                                                    | 10.86, 50 <sup>b</sup> ,<br>0.9450<br>(-13.27/-12.79) | 11.42, 40,<br>0.9485, -13.40<br>(-15.06/-13.87)                | not calc.                                                    | not conv.                                                    | not calc.                                                  | 11.39, 45 <sup>b</sup> ,<br>0.9493<br>(-15.16/-13.87)   | not calc.                                           |
| m-i3wc        | 14.04, 78 <sup>a,d</sup> ,<br>0.9296, -9.19<br>(-11.10/-9.77) | not calc.                                                    | 13.91, 71 <sup>a,d</sup> ,<br>0.9303<br>(-9.67/-9.16) | 14.34, 70 <sup>a,d</sup> ,<br>0.9343, -9.66<br>(-11.51/-10.27) | not calc.                                                    | not conv.                                                    | not calc.                                                  | 14.84, 68 <sup>a,d</sup> ,<br>0.9341<br>(-11.31/-10.09) | not calc.                                           |

\* CP at every step of geometry optimization; \*\* no CH...O or OH...π interaction as compared to the structures optimized with the other DFT functionals. <sup>a</sup> transitions (sym. OH and asym. anilinic NH) or <sup>b</sup> sym. OH and sym. anilinic NH or <sup>d</sup> asym. anilinic NH and sulf./heterocycle-NH in wrong order. RMS actually higher

Table S7: BSSE and ZPE-corrected relative energies, RMS values (cm<sup>-1</sup>) and scaling factors for the harmonic frequencies, sum of intermolecular EML energies, and complexation energies (kcal/mol) of the monohydrated complexes of sulfisoxazole. The complexation energies are given in parentheses (raw/corrected). mid = 6-311++G(d,p); big = 6-311++G(3df,3pd). Not conv. = converged to different structure during geometry optimization

|               | M05-2X                                                        |                                              | M06-2X                                                        |                                                | B3LYP                                                        |                                                           | ωB97xD                                                 |                                       |
|---------------|---------------------------------------------------------------|----------------------------------------------|---------------------------------------------------------------|------------------------------------------------|--------------------------------------------------------------|-----------------------------------------------------------|--------------------------------------------------------|---------------------------------------|
|               | mid                                                           | big                                          | mid                                                           | big                                            | mid                                                          | big                                                       | mid                                                    | big                                   |
| <b>i-a1wb</b> | 0.00, 8,<br>0.9413, -12.52<br>(-12.32/-11.17)                 | 0.00, 6,<br>0.9417, -12.61<br>(-10.49/-9.91) | 0.35, 18,<br>0.9446, -12.90<br>(-12.56/-11.34)                | 0.00, 18,<br>0.9460, -12.90<br>(-10.73/-10.12) | 0.00, 9 <sup>a</sup> ,<br>0.9589, -11.17<br>(-9.48/-8.38)    | 0.00, 8 <sup>a</sup> ,<br>0.9548, -10.86<br>(-7.99/-7.45) | 0.29, 19,<br>0.9442<br>(-11.76/-10.58)                 | 0.00, 13,<br>0.9453<br>(-10.03/-9.42) |
| i-a1wc        | 0.18, 71 <sup>a,d</sup> ,<br>0.9451, -9.19<br>(-13.28/-12.19) | not calc.                                    | 0.00, 70 <sup>d</sup> ,<br>0.9496, 10.45<br>(-13.89/-12.71)   | not calc.                                      | 1.53, 76 <sup>a</sup> ,<br>0.9614, -5.99<br>(-10.12/-9.18)   | not calc.                                                 | 0.00, 70 <sup>a,d</sup> ,<br>0.9485<br>(-13.65/-12.53) | not calc.                             |
| i-a1wa        | 1.47, 21,<br>0.9371, -9.94<br>(-10.20/-9.02)                  | 1.30, 24,<br>0.9375, -9.19<br>(-8.58/-8.01)  | 1.52, 32,<br>0.9414, -10.70<br>(-10.54/-9.30)                 | 1.27, 35,<br>0.9426, -9.94<br>(-8.91/-8.29)    | 1.21, 23,<br>0.9541, -8.60<br>(-7.69/-6.57)                  | 1.08, 22,<br>0.9548, -7.78<br>(-6.42/-5.93)*              | 1.55, 32,<br>0.9394<br>(-9.97/-8.78)                   | 1.05, 30,<br>0.9406<br>(-8.57/-7.95)  |
| i-a1wd        | 1.91, 64,<br>0.9401, -7.69<br>(-10.61/-9.49)                  | not calc.                                    | 0.9446, 8.66<br>(-11.22/-10.04)                               | not calc.                                      | not conv.                                                    | not calc.                                                 | 0.9435<br>(-11.07/-9.93)                               | not calc.                             |
| i-a1we        | not conv.                                                     | not calc.                                    | not conv.                                                     | not calc.                                      | 1.29, 68 <sup>a</sup> ,<br>0.9540, 6.46<br>(-6.64/-6.08)     | not calc.                                                 | not conv.                                              | not calc.                             |
| i-a1wf        | 2.07, 27,<br>0.9385, -9.48<br>(-10.45/-9.05)                  | not calc.                                    | 1.89, 32,<br>0.9421, -9.88<br>(-11.06/-9.63)                  | not calc.                                      | 1.31, 26,<br>0.9525, -8.03<br>(-7.18/-6.15)                  | not calc.                                                 | 2.04, 30,<br>0.9405<br>(-10.31/-8.79)                  | not calc.                             |
| i-a2wac       | 2.22, 51,<br>0.9362, -9.45<br>(-11.88/-10.56)                 | not calc.                                    | 1.76, 49,<br>0.9401, -10.35<br>(-12.52/-11.14)                | not calc.                                      | 3.61, 49,<br>0.9525, -5.78<br>(-8.12/-6.91)                  | not calc.                                                 | 1.76, 55,<br>0.9375<br>(-11.48/-10.19)                 | not calc.                             |
| i-a2wb        | 2.23, 31,<br>0.9444, -11.74<br>(-11.50/-10.33)                | not calc.                                    | 2.25, 38,<br>0.9478, -11.76<br>(-11.66/-10.42)                | not calc.                                      | 2.14, 38,<br>0.9634, -11.42<br>(-9.51/-8.29)                 | not calc.                                                 | 1.79, 36,<br>0.9465<br>(-11.11/-9.95)                  | not calc.                             |
| i-i1wa        | 10.84, 29 <sup>a</sup> ,<br>0.9459, -13.80<br>(-16.85/-15.68) | not calc.                                    | 11.57, 26 <sup>a</sup> ,<br>0.9497, -14.47<br>(-17.08/-15.86) | not calc.                                      | 8.54, 27 <sup>a</sup> ,<br>0.9625, -11.29<br>(-13.47/-12.40) | not calc.                                                 | 11.99, 31 <sup>a</sup> ,<br>0.9478<br>(-16.09/-14.90)  | not calc.                             |
| i-i1wb        | 16.03, 61,<br>0.9367, -8.34<br>(-10.36/-9.01)                 | not calc.                                    | not conv.                                                     | not calc.                                      | not conv.                                                    | not calc.                                                 | 16.16, 62,<br>0.9386<br>(-10.24/-8.90)                 | not calc.                             |
| i-i2wa        | 16.38, 58,<br>0.9365, -5.59<br>(-9.43/-8.06)                  | not calc.                                    | 16.38, 51,<br>0.9414, -5.80<br>(-9.80/-8.42)                  | not calc.                                      | not conv.                                                    | not calc.                                                 | 15.98, 58,<br>0.9394<br>(-9.89/-8.53)                  | not calc.                             |
| i-i2wb        | 17.74, 51,<br>0.9358, -5.74<br>(-8.05/-6.93)                  | not calc.                                    | 17.91, 43,<br>0.9413, -6.40<br>(-8.29/-7.14)                  | not calc.                                      | 14.81, 54 <sup>a</sup> ,<br>0.9546, -4.14<br>(-6.37/-5.14)   | not calc.                                                 | 17.45, 53,<br>0.9386<br>(-7.96/-6.98)                  | not calc.                             |
| i-i2wc        | 18.87, 68,<br>0.9364, -9.42<br>(-12.04/-10.72)                | not calc.                                    | 18.84, 62,<br>0.9409, -9.81<br>(-12.31/-10.95)                | not calc.                                      | 17.87, 58,<br>0.9548, -7.72<br>(-8.88/-7.62)                 | not calc.                                                 | 18.19, 63,<br>0.9390<br>(-11.78/-10.40)                | not calc.                             |
| i-i2wd        | 19.08, 69,<br>0.9362, -9.35<br>(-11.94/-10.62)                | not calc.                                    | 18.97, 62,<br>0.9407, -9.79<br>(-12.21/-10.84)                | not calc.                                      | 17.93, 59,<br>0.9542, -7.65<br>(-8.81/-7.55)                 | not calc.                                                 | 18.15, 64,<br>0.9387<br>(-11.64/-10.25)                | not calc.                             |
| i-i2we        | 21.49, 52,<br>0.9346, -3.99<br>(-10.59/-9.21)                 | not calc.                                    | 20.91, 43,<br>0.9407, -4.33<br>(-12.59/-11.02)                | not calc.                                      | not conv.                                                    | not calc.                                                 | 20.99, 52,<br>0.9350<br>(-11.02/-9.56)                 | not calc.                             |

\* no CH...O H-bond; <sup>a</sup> transitions (sym. OH and asym. anilinic NH) or <sup>b</sup> sym. OH and sym. anilinic NH or <sup>d</sup> asym. anilinic NH and sulf.-NH in wrong order. RMS actually higher

## Quantum topological key parameters at the bond critical points of the conformers of SMX and SIX

Table S8: Summary of the QTAIM results regarding the non-covalent interactions in the conformers of the amido and imido tautomers of **sulfamethoxazole**. Atomic units are used except for the energy of the hydrogen bonds (kcal/mol). The wave functions were derived at the **B3LYP/6-311++G(3df,3pd)** level of theory for all conformers. All structures were fully optimized at the same level of theory as the wave function used

| Interaction    | $\rho(\mathbf{r}_{BCP})$ | $\nabla^2\rho(\mathbf{r}_{BCP})$ | $V(\mathbf{r}_{BCP})$ | $G(\mathbf{r}_{BCP})$ | $H(\mathbf{r}_{BCP})$ | $E_{HB}$ | $BPL$ (Å) |
|----------------|--------------------------|----------------------------------|-----------------------|-----------------------|-----------------------|----------|-----------|
| <i>m-a1</i>    |                          |                                  |                       |                       |                       |          |           |
| SO $\cdots$ HC | 0.0098                   | 0.0361                           | -0.0064               | 0.0077                | 0.0013                | -2.01    | 2.826     |
| <i>m-a3</i>    |                          |                                  |                       |                       |                       |          |           |
| N $\cdots$ HC  | 0.0067                   | 0.0228                           | -0.0035               | 0.0046                | 0.0011                | -1.10    | 3.127     |
| <i>m-i2</i>    |                          |                                  |                       |                       |                       |          |           |
| NH $\cdots$ OS | 0.0241                   | 0.0986                           | -0.0186               | 0.0216                | 0.0030                | -5.84    | 2.114     |
| <i>m-i1</i>    |                          |                                  |                       |                       |                       |          |           |
| NH $\cdots$ OS | 0.0241                   | 0.0952                           | -0.0183               | 0.0211                | 0.0028                | -5.74    | 2.104     |
| <i>m-i3</i>    |                          |                                  |                       |                       |                       |          |           |
| CH $\cdots$ OS | 0.0141                   | 0.0526                           | -0.0095               | 0.0113                | 0.0018                | -2.98    | 2.509     |

Table S9: Summary of the QTAIM results regarding the non-covalent interactions in the conformers of the amido and imido tautomers of **sulfamethoxazole**. Atomic units are used except for the energy of the hydrogen bonds (kcal/mol). The wave functions were derived at the **M05-2X/6-311++G(3df,3pd)** level of theory for all conformers but **m-a2**. The wave function for **m-a2** was derived at the **M05-2X/6-311++G(df,pd)** level of theory. All structures were fully optimized at the same level of theory as the wave function used

| Interaction                | $\rho(\mathbf{r}_{BCP})$ | $\nabla^2\rho(\mathbf{r}_{BCP})$ | $V(\mathbf{r}_{BCP})$ | $G(\mathbf{r}_{BCP})$ | $H(\mathbf{r}_{BCP})$ | $E_{HB}$ | $BPL$ (Å) |
|----------------------------|--------------------------|----------------------------------|-----------------------|-----------------------|-----------------------|----------|-----------|
| <i>m-a1</i>                |                          |                                  |                       |                       |                       |          |           |
| SO $\cdots$ HC             | 0.0112                   | 0.0419                           | -0.0079               | 0.0092                | 0.0013                | -2.48    | 3.026     |
| <i>m-a2</i>                |                          |                                  |                       |                       |                       |          |           |
| CH $\cdots$ CS             | 0.0075                   | 0.0216                           | -0.0040               | 0.0047                | 0.0007                | -1.26    | 2.984     |
| <i>m-a3</i>                |                          |                                  |                       |                       |                       |          |           |
| N $\cdots$ HC <sup>a</sup> | 0.0085                   | 0.0296                           | -0.0048               | 0.0061                | 0.0013                | -1.51    | 3.368     |
| <i>m-i2</i>                |                          |                                  |                       |                       |                       |          |           |
| NH $\cdots$ OS             | 0.0256                   | 0.1082                           | -0.0213               | 0.0242                | 0.0029                | -6.68    | 2.096     |
| <i>m-i1</i>                |                          |                                  |                       |                       |                       |          |           |
| NH $\cdots$ OS             | 0.0258                   | 0.1090                           | -0.0215               | 0.0244                | 0.0029                | -6.75    | 2.084     |
| <i>m-i3</i>                |                          |                                  |                       |                       |                       |          |           |
| CH $\cdots$ OS             | 0.0164                   | 0.0634                           | -0.0119               | 0.0139                | 0.0020                | -3.73    | 2.488     |
| <i>m-i4</i>                |                          |                                  |                       |                       |                       |          |           |
| CH $\cdots$ OS             | 0.0169                   | 0.0659                           | -0.0123               | 0.0144                | 0.0021                | -3.86    | 2.463     |

<sup>a</sup> the bond path does not go to the H atom but the C-atom. However, we assume a H-bond as seen in the results using B3LYP.

Table S10: Summary of the QTAIM results regarding the non-covalent interactions in the conformers of the amido and imido tautomers of **sulfamethoxazole**. Atomic units are used except for the energy of the hydrogen bonds (kcal/mol). The wave functions were derived at the **M06-2X/6-311++G(3df,3pd)** level of theory for all conformers. All structures were fully optimized at the same level of theory as the wave function used

| Interaction                | $\rho(\mathbf{r}_{BCP})$ | $\nabla^2\rho(\mathbf{r}_{BCP})$ | $V(\mathbf{r}_{BCP})$ | $G(\mathbf{r}_{BCP})$ | $H(\mathbf{r}_{BCP})$ | $E_{HB}$ | $BPL$ (Å) |
|----------------------------|--------------------------|----------------------------------|-----------------------|-----------------------|-----------------------|----------|-----------|
| <i>m-a1</i>                |                          |                                  |                       |                       |                       |          |           |
| SO $\cdots$ HC             | 0.0113                   | 0.0422                           | -0.0079               | 0.0092                | 0.0013                | -2.48    | 2.889     |
| <i>m-a3</i>                |                          |                                  |                       |                       |                       |          |           |
| N $\cdots$ HC <sup>a</sup> | 0.0086                   | 0.0301                           | -0.0049               | 0.0062                | 0.0013                | -1.54    | 3.419     |
| <i>m-i2</i>                |                          |                                  |                       |                       |                       |          |           |
| NH $\cdots$ OS             | 0.0245                   | 0.1071                           | -0.0205               | 0.0236                | 0.0031                | -6.43    | 2.106     |
| <i>m-i1</i>                |                          |                                  |                       |                       |                       |          |           |
| NH $\cdots$ OS             | 0.0248                   | 0.1080                           | -0.0207               | 0.0238                | 0.0031                | -6.49    | 2.094     |
| <i>m-i3</i>                |                          |                                  |                       |                       |                       |          |           |
| CH $\cdots$ OS             | 0.0162                   | 0.0649                           | -0.0118               | 0.0140                | 0.0022                | -3.07    | 2.459     |

<sup>a</sup> the bond path does not go to the H atom but the C-atom. However, we assume a H-bond as seen in the results using B3LYP.

Table S11: Summary of the QTAIM results regarding the non-covalent interactions in the conformers of the amido and imido tautomers of **sulfisoxazole**. Atomic units are used except for the energy of the hydrogen bonds (kcal/mol). The wave functions were derived at the **B3LYP/6-311++G(3df,3pd)** level of theory for all conformers. All structures were fully optimized at the same level of theory as the wave function used

| Interaction                 | $\rho(r_{BCP})$                     | $\nabla^2\rho(r_{BCP})$ | $V(r_{BCP})$ | $G(r_{BCP})$ | $H(r_{BCP})$ | $E_{HB}$ | $BPL$ (Å) |
|-----------------------------|-------------------------------------|-------------------------|--------------|--------------|--------------|----------|-----------|
| <i>i-a1</i>                 |                                     |                         |              |              |              |          |           |
| CH $\cdots$ OS              | 0.0064                              | 0.0240                  | -0.0040      | 0.0050       | 0.0010       | -1.26    | 2.9688    |
| <i>i-a2</i>                 |                                     |                         |              |              |              |          |           |
| CH $\cdots$ CS              | 0.0042                              | 0.0131                  | -0.0020      | 0.0026       | 0.0006       | -0.63    | 3.1405    |
| <i>i-a7</i>                 |                                     |                         |              |              |              |          |           |
| CH $\cdots$ ON              | 0.0047                              | 0.0175                  | -0.0026      | 0.0035       | 0.0009       | -0.82    | 3.3060    |
| <i>i-i1</i>                 | no non-covalent interaction present |                         |              |              |              |          |           |
| <i>i-i2</i>                 |                                     |                         |              |              |              |          |           |
| CH $\cdots$ OS <sup>a</sup> | 0.0096                              | 0.0317                  | -0.0059      | 0.0069       | 0.0010       | -1.85    | 2.6343    |
| CH $\cdots$ OS <sup>b</sup> | 0.0097                              | 0.0315                  | -0.0059      | 0.0069       | 0.0010       | -1.85    | 2.6036    |
| <i>i-i3</i>                 | no non-covalent interaction present |                         |              |              |              |          |           |
| <i>i-i4</i>                 | no non-covalent interaction present |                         |              |              |              |          |           |

<sup>a</sup> opposite side of heterocycle N-H atom; <sup>b</sup> same side

Table S12: Summary of the QTAIM results regarding the non-covalent interactions in the conformers of the amido and imido tautomers of **sulfisoxazole**. Atomic units are used except for the energy of the hydrogen bonds (kcal/mol). The wave functions were derived at the **M05-2X/6-311++G(3df,3pd)** level of theory for all conformers but *i-a3*. The wave function for *i-a3* was derived at the **M05-2X/6-311++G(d,p)** level of theory. All structures were fully optimized at the same level of theory as the wave function used

| Interaction                 | $\rho(r_{BCP})$                     | $\nabla^2\rho(r_{BCP})$ | $V(r_{BCP})$ | $G(r_{BCP})$ | $H(r_{BCP})$ | $E_{HB}$ | $BPL$ (Å) |
|-----------------------------|-------------------------------------|-------------------------|--------------|--------------|--------------|----------|-----------|
| <i>i-a1</i>                 |                                     |                         |              |              |              |          |           |
| CH $\cdots$ OS              | 0.0081                              | 0.0316                  | -0.0056      | 0.0067       | 0.0011       | -1.76    | 3.1582    |
| <i>i-a2</i>                 |                                     |                         |              |              |              |          |           |
| CH $\cdots$ CS              | 0.0068                              | 0.0211                  | -0.0036      | 0.0045       | 0.0009       | -1.13    | 3.0138    |
| CH $\cdots$ CH              | 0.0055                              | 0.0175                  | -0.0029      | 0.0036       | 0.0007       | -0.91    | 3.2055    |
| <i>i-a3</i>                 |                                     |                         |              |              |              |          |           |
| CH $\cdots$ OS              | 0.0078                              | 0.0276                  | -0.0051      | 0.0060       | 0.0009       | -1.60    | 2.8265    |
| <i>i-a4</i>                 |                                     |                         |              |              |              |          |           |
| CH $\cdots$ CH              | 0.0050                              | 0.0150                  | -0.0026      | 0.0032       | 0.0006       | -0.82    | 3.3093    |
| <i>i-a5</i>                 | no non-covalent interaction present |                         |              |              |              |          |           |
| <i>i-i1</i>                 | no non-covalent interaction present |                         |              |              |              |          |           |
| <i>i-i2</i>                 |                                     |                         |              |              |              |          |           |
| CH $\cdots$ OS <sup>a</sup> | 0.0119                              | 0.0406                  | -0.0079      | 0.0090       | 0.0011       | -2.48    | 2.5646    |
| CH $\cdots$ OS <sup>b</sup> | 0.0119                              | 0.0395                  | -0.0077      | 0.0088       | 0.0011       | -2.42    | 2.5147    |
| <i>i-i3</i>                 | no non-covalent interaction present |                         |              |              |              |          |           |
| <i>i-i4</i>                 | no non-covalent interaction present |                         |              |              |              |          |           |

<sup>a</sup> opposite side of heterocycle N-H atom; <sup>b</sup> same side



Table S13: Summary of the QTAIM results regarding the non-covalent interactions in the conformers of the amido and imido tautomers of **sulfisoxazole**. Atomic units are used except for the energy of the hydrogen bonds (kcal/mol). The wave functions were derived at the **M06-2X/6-311++G(3df,3pd)** level of theory for all conformers. All structures were fully optimized at the same level of theory as the wave function used

| Interaction                                     | $\rho(r_{BCP})$ | $\nabla^2\rho(r_{BCP})$ | $V(r_{BCP})$ | $G(r_{BCP})$ | $H(r_{BCP})$ | $E_{HB}$ | BPL (Å) |
|-------------------------------------------------|-----------------|-------------------------|--------------|--------------|--------------|----------|---------|
| <i>i-a1</i>                                     |                 |                         |              |              |              |          |         |
| CH...OS <sup>a</sup>                            | 0.0086          | 0.0335                  | -0.0060      | 0.0072       | 0.0012       | -1.88    | 3.3749  |
| <i>i-a2</i>                                     |                 |                         |              |              |              |          |         |
| CH...CS                                         | 0.0066          | 0.0209                  | -0.0035      | 0.0043       | 0.0008       | -1.10    | 3.3783  |
| CH...CH                                         | 0.0066          | 0.0199                  | -0.0034      | 0.0042       | 0.0008       | -1.07    | 3.1133  |
| <i>i-a4</i>                                     |                 |                         |              |              |              |          |         |
| CH...CH                                         | 0.0060          | 0.0176                  | -0.0031      | 0.0038       | 0.0007       | -0.97    | 3.0676  |
| CH...CS <sup>a</sup>                            | 0.0059          | 0.0194                  | -0.0032      | 0.0040       | 0.0008       | -1.00    | 3.7777  |
| <i>i-a6</i>                                     |                 |                         |              |              |              |          |         |
| CH...CS                                         | 0.0079          | 0.0238                  | -0.0041      | 0.0050       | 0.0009       | -1.29    | 2.9890  |
| CH...OS                                         | 0.0066          | 0.0230                  | -0.0043      | 0.0050       | 0.0007       | -1.35    | 2.9928  |
| <i>i-i1</i> no non-covalent interaction present |                 |                         |              |              |              |          |         |
| <i>i-i2</i>                                     |                 |                         |              |              |              |          |         |
| CH...OS <sup>b</sup>                            | 0.0118          | 0.0411                  | -0.0079      | 0.0091       | 0.0012       | -2.48    | 2.5624  |
| CH...OS <sup>c</sup>                            | 0.0119          | 0.0401                  | -0.0078      | 0.0089       | 0.0011       | -2.45    | 2.4988  |
| <i>i-i3</i> no non-covalent interaction present |                 |                         |              |              |              |          |         |
| <i>i-i4</i> no non-covalent interaction present |                 |                         |              |              |              |          |         |

<sup>a</sup> bond path actually goes to the C atom. However, we assume that it is a tracing error (cf. B3LYP results). <sup>b</sup> opposite side of heterocycle N-H atom; <sup>c</sup> same side

## Potential energy scans and transition states

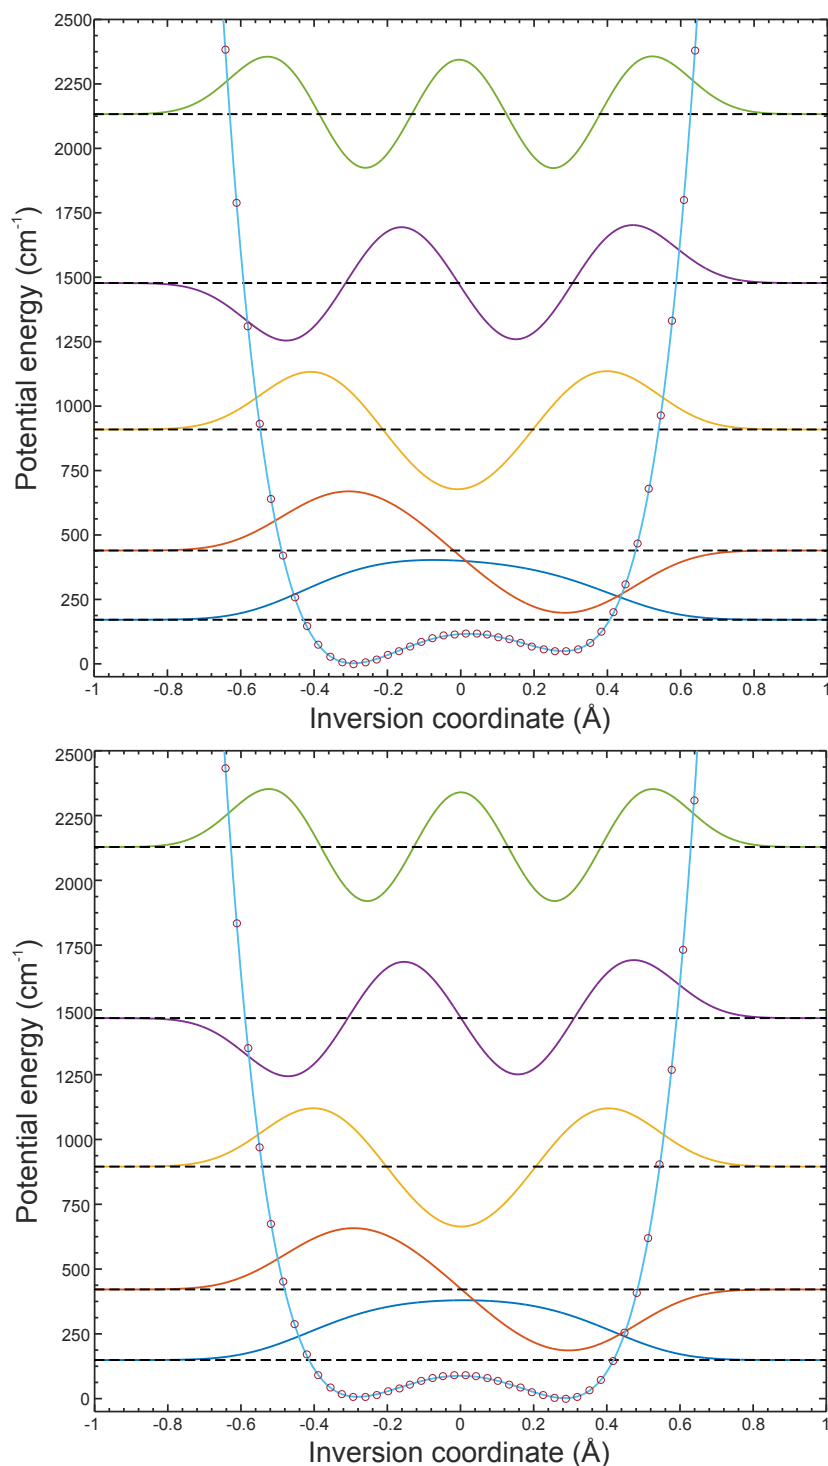

Figure S2: Inversion potential (M05-2X/6-311++G(3df,3pd)) for the anilinic group in SMX (top) and SIX (bottom). The inversion coordinate is given as the distance along the line that intersects both the CN bond direction at right angle and the midpoint between the two hydrogen atoms. A negative value for the inversion coordinate translates to the hydrogen atoms being on the same side of the phenyl plane as the oxygen atoms of the sulfonamide group. The reduced masses used were 1.234 amu and 1.223 amu, respectively. The vibrational eigenvalues and eigenfunctions of the potential energy curves were determined numerically using the Numerov method<sup>4,5</sup>.

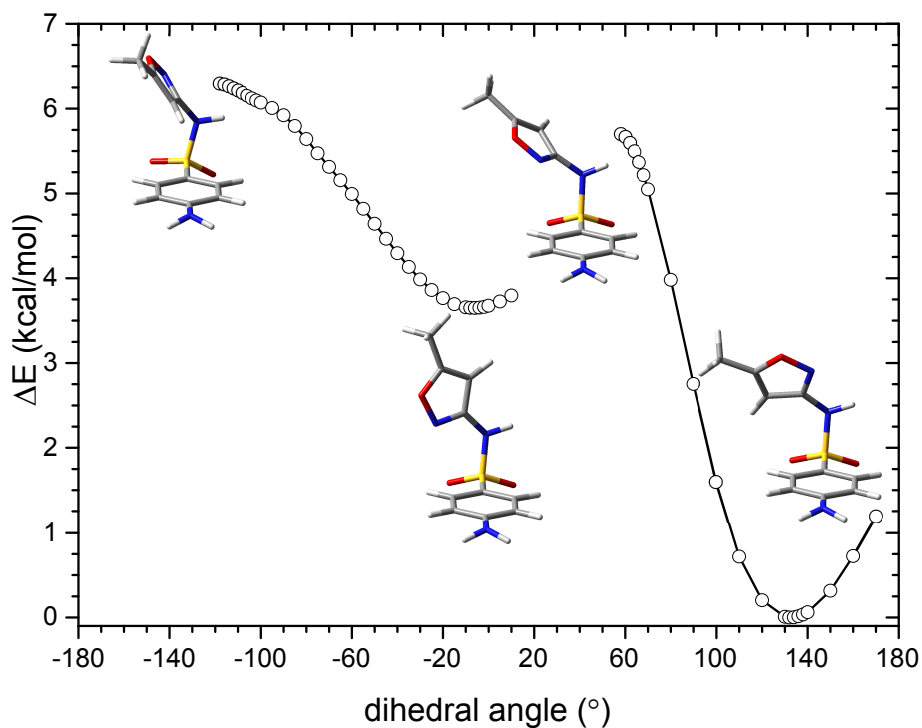

Figure S3: Relaxed potential energy scan connecting the conformers m-a3 and m-a1 of sulfamethoxazole. The N-C-N-S dihedral angle was scanned. The structures of the minima and transition states are given. M05-2X/6-311++G(3df,3pd) was used for all calculations.

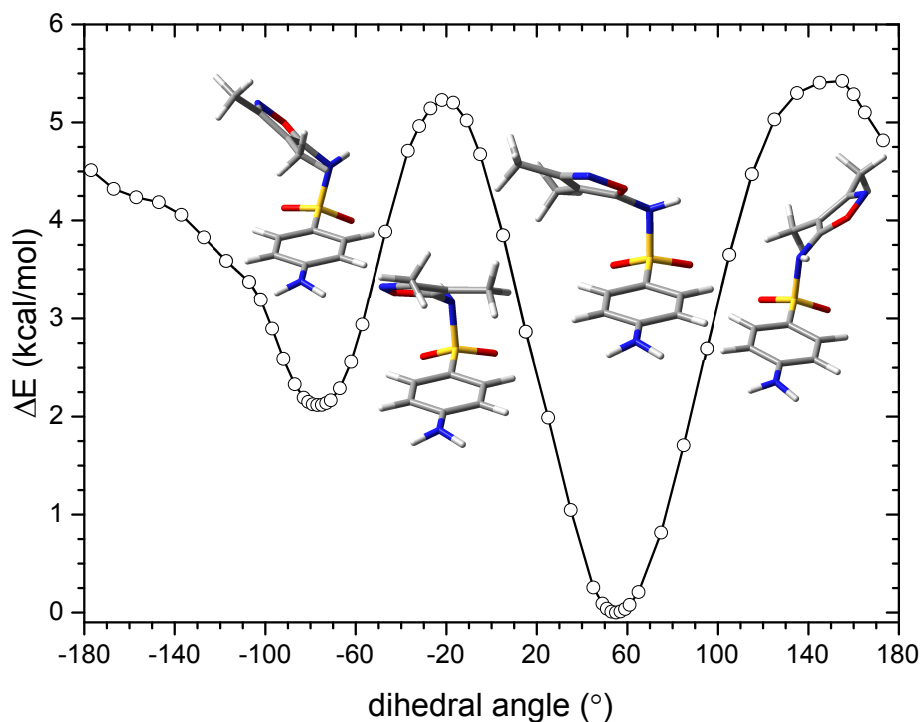

Figure S4: Relaxed potential energy scan connecting the conformers i-a2 and i-a1 of sulfisoxazole. The C-N-S-C dihedral angle was scanned. The structures of the minima and transition states are given. M05-2X/6-311++G(3df,3pd) was used for all calculations.

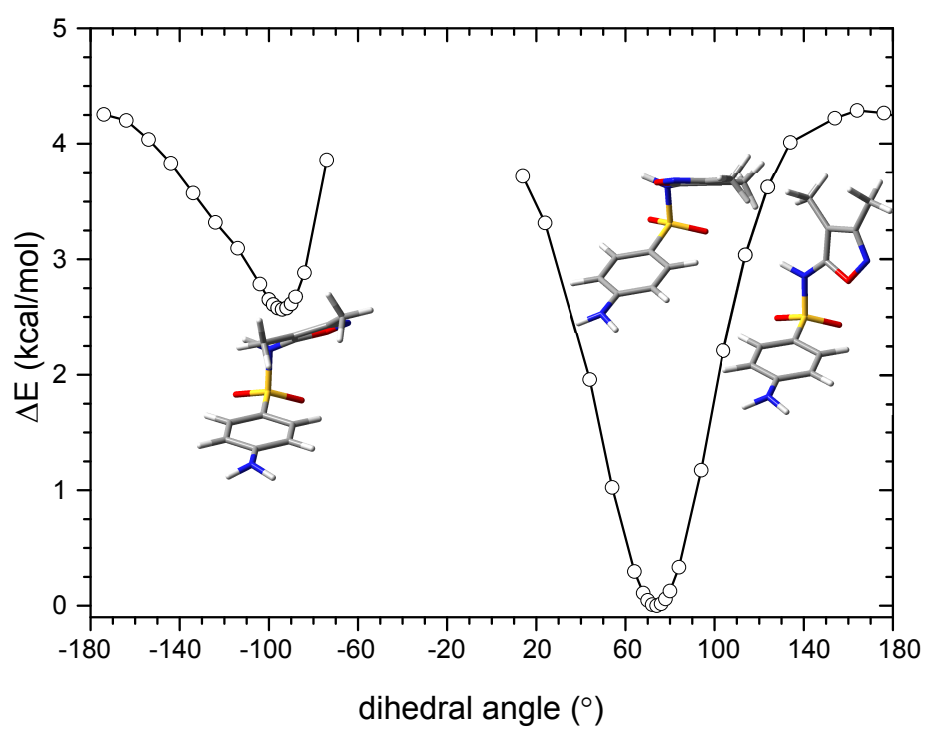

Figure S5: Relaxed potential energy scan connecting the conformers i-a4 and i-a1 of sulfisoxazole. The C-C-N-S dihedral angle was scanned. The structures of the minima and transition states are given. M05-2X/6-311++G(3df,3pd) was used for all calculations.

## Molecular graphs of all calculated monohydrated complexes of SMX and SIX

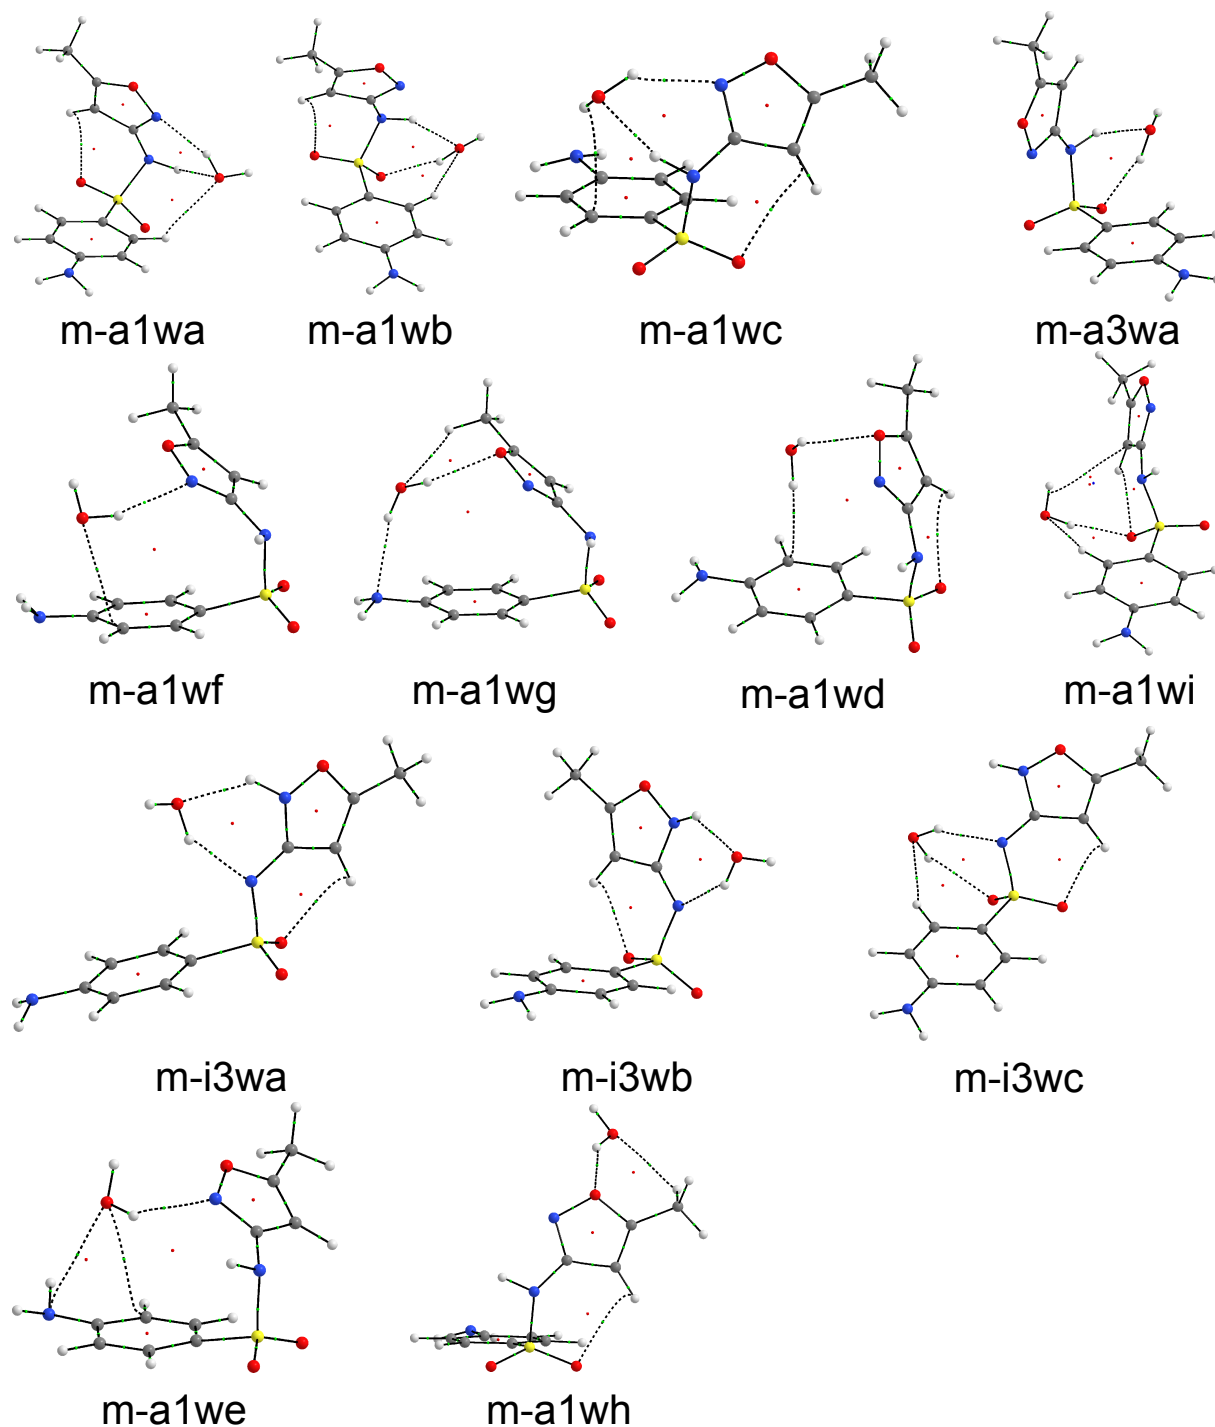

Figure S6: The molecular graphs of all SMX isomers. All geometries were optimized using M05-2X/6-311++G(d,p) unless for the last two isomers that were only stable using M06-2X or B3LYP, respectively.

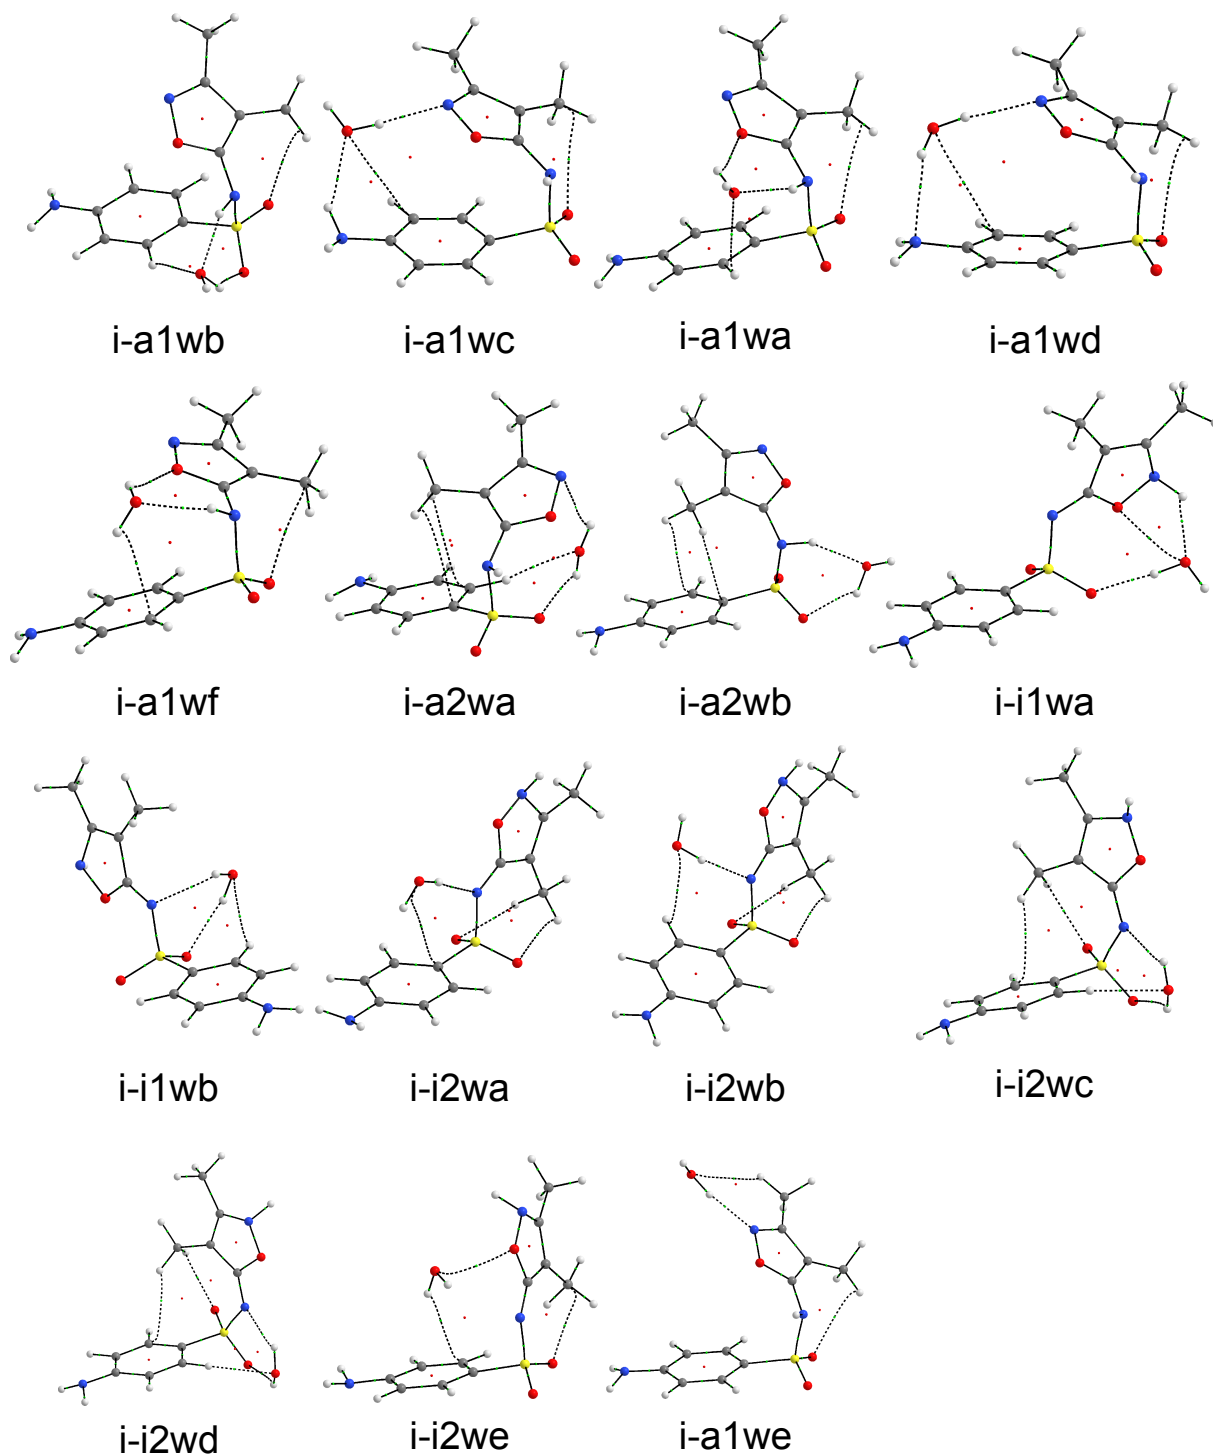

Figure S7: The molecular graphs of all SIX isomers. All geometries were optimized using M05-2X/6-311++G(d,p) unless for the last isomer that was only stable using B3LYP.

## Tentative assignment of the R2PI spectra of SMX and SIX

The most prominent vibronic progressions in the RIDIR spectra of the SMX and SIX monomers are based on an  $S_1$  excited state vibration with a frequency of  $+72\text{ cm}^{-1}$  and  $+69\text{ cm}^{-1}$ , respectively. Using harmonic  $S_1$  state frequencies calculated at the TD-B3LYP/6-31+G(d) and CIS/6-31+G(d) level of theory, we tentatively assign the asymmetric butterfly motion with a calculated unscaled frequency of  $80\text{ cm}^{-1}$  (CIS:  $66\text{ cm}^{-1}$ ) in SMX and  $63\text{ cm}^{-1}$  (CIS:  $75\text{ cm}^{-1}$ ) in SIX as the origin of these progressions. Additionally, we observed a very prominent vibronic progression built upon a mode with a frequency of  $+34\text{ cm}^{-1}$  in the R2PI spectrum of SIX. Based on our  $S_1$  state harmonic frequency calculations at the CIS/6-31+G(d) and TD-B3LYP/6-31+G(d) levels of theory, we tentatively suggest that this transition is either due to a normal mode consisting of  $\gamma(\text{NH}_2)$  and  $\tau(\text{N-heterocycle})$  (CIS:  $32\text{ cm}^{-1}$ ) or a normal mode consisting of  $\tau(\text{N-heterocycle})$  and  $\tau(\text{S-phenyl})$  (TD-B3LYP:  $35\text{ cm}^{-1}$ ). A similar transition is present in the R2PI spectrum of SIX at  $+31\text{ cm}^{-1}$  but with much lower relative intensity. Therefore, only in the R2PI spectrum of SIX a hot band originating from the corresponding vibrationally excited ground state is present  $-33\text{ cm}^{-1}$  red-shifted with respect to the electronic origin. Assuming a Boltzmann distribution and using the integrated intensities of the transitions at  $+34\text{ cm}^{-1}$  and  $-33\text{ cm}^{-1}$  the vibrational temperature of SIX under our experimental conditions is estimated to be 21 K. The very same pattern ( $+34\text{ cm}^{-1}$  and  $+69\text{ cm}^{-1}$  as well as  $+31\text{ cm}^{-1}$  and  $+72\text{ cm}^{-1}$ ) as around the electronic origin can be observed  $+815\text{ cm}^{-1}$  (for SIX) and  $+816\text{ cm}^{-1}$  (for SMX) blue-shifted as combination bands, building the same vibronic progression upon a vibration tentatively assigned to a mode similar to mode 1, sometimes denoted as mode 12, of aniline. This aniline normal mode mainly consists of three in-phase stretching contributions, namely  $\nu(\text{C}_1\text{-N})$ ,  $\nu(\text{C}_1\text{-C}_2)$  and  $\nu(\text{C}_1\text{-C}_6)$ . The assignment was based on harmonic frequency calculations and comparison to published and assigned vibronic spectra of aniline's  $S_1$  ( $^1B_2$ ) excited state.<sup>6,7</sup> Depending on the theoretical method and the molecule the mode has some contribution from  $\nu(\text{NO})$ ,  $\gamma(\text{CH})$  or inversion at the sulfonamide nitrogen atom. The unscaled harmonic frequencies are for SMX  $842\text{ cm}^{-1}$  (CIS and TD-B3LYP), and for SIX  $849\text{ cm}^{-1}$  (CIS) and  $835\text{ cm}^{-1}$  (TD-B3LYP).

## Quantum topological key parameters at the bond critical points of the monohydrated complexes of SMX and SIX

Table S14: Summary of the QTAIM results regarding the non-covalent interactions in the isomers of the amido and imido tautomers of **sulfamethoxazole-H<sub>2</sub>O**. Atomic units are used except for the energy of the hydrogen bonds (kcal/mol). The geometries were optimized and the wave functions were derived at the **M05-2X/6-311++G(d,p)** level of theory

| Interaction                              | $\rho(r_{\text{BCP}})$ | $\nabla^2\rho(r_{\text{BCP}})$ | $V(r_{\text{BCP}})$ | $G(r_{\text{BCP}})$ | $H(r_{\text{BCP}})$ | $E_{\text{HB}}$ | $\sum_i E_{\text{HB}}^{\text{inter},i}$ | BPL (Å) |
|------------------------------------------|------------------------|--------------------------------|---------------------|---------------------|---------------------|-----------------|-----------------------------------------|---------|
| <b><i>m-a1wa</i></b>                     |                        |                                |                     |                     |                     |                 |                                         |         |
| CH...OS                                  | 0.0107                 | 0.0380                         | -0.0071             | 0.0083              | 0.0012              | -2.23           |                                         | 2.7663  |
| NH...O(w)                                | 0.0221                 | 0.0848                         | -0.0166             | 0.0189              | 0.0023              | -5.21           |                                         | 2.0362  |
| CH <sub>phenyl</sub> ...O(w)             | 0.0073                 | 0.0247                         | -0.0045             | 0.0053              | 0.0008              | -1.41           | -11.77                                  | 2.6400  |
| OH(w)...NO                               | 0.0228                 | 0.0824                         | -0.0164             | 0.0185              | 0.0021              | -5.15           |                                         | 2.0729  |
| <b><i>m-a1wb</i></b>                     |                        |                                |                     |                     |                     |                 |                                         |         |
| CH...OS                                  | 0.0106                 | 0.0379                         | -0.0071             | 0.0083              | 0.0012              | -2.23           |                                         | 2.7712  |
| NH...O(w)                                | 0.2100                 | 0.0815                         | -0.0155             | 0.0179              | 0.0024              | -4.86           |                                         | 2.0490  |
| CH <sub>phenyl</sub> ...O(w)             | 0.0086                 | 0.0291                         | -0.0052             | 0.0063              | 0.0011              | -1.63           | -12.51                                  | 2.4873  |
| OH(w)...OS                               | 0.0234                 | 0.0952                         | -0.0192             | 0.0215              | 0.0023              | -6.02           |                                         | 2.0135  |
| <b><i>m-a1wc</i></b>                     |                        |                                |                     |                     |                     |                 |                                         |         |
| CH...OS <sup>b</sup>                     | 0.0118                 | 0.0444                         | -0.0082             | 0.0097              | 0.0015              | -2.57           |                                         | 3.1670  |
| NH...O(w)                                | 0.0199                 | 0.0712                         | -0.0141             | 0.0160              | 0.0019              | -4.42           |                                         | 2.1248  |
| OH(w)...CH <sub>phenyl</sub>             | 0.0071                 | 0.0226                         | -0.0038             | 0.0047              | 0.0009              | -1.19           | -10.25                                  | 2.9380  |
| OH(w)...NO                               | 0.0211                 | 0.0761                         | -0.0148             | 0.0169              | 0.0021              | -4.64           |                                         | 2.1186  |
| <b><i>m-a3wa</i></b>                     |                        |                                |                     |                     |                     |                 |                                         |         |
| NH...O(w)                                | 0.0229                 | 0.0907                         | -0.0174             | 0.0201              | 0.0027              | -5.46           | -12.55                                  | 1.9957  |
| OH(w)...OS                               | 0.0265                 | 0.1070                         | -0.0226             | 0.0247              | 0.0021              | -7.09           |                                         | 1.9432  |
| <b><i>m-a1wf</i></b>                     |                        |                                |                     |                     |                     |                 |                                         |         |
| OH(w)...NO                               | 0.0145                 | 0.0516                         | -0.0085             | 0.0107              | 0.0022              | -2.67           | -4.18                                   | 2.2504  |
| O(w)...CH <sub>phenyl</sub> <sup>c</sup> | 0.0077                 | 0.0289                         | -0.0048             | 0.0060              | 0.0012              | -1.51           |                                         | 3.4614  |
| <b><i>m-a1wg</i></b>                     |                        |                                |                     |                     |                     |                 |                                         |         |
| methylCH...O(w)                          | 0.0062                 | 0.0212                         | -0.0039             | 0.0046              | 0.0007              | -1.22           |                                         | 2.6930  |
| OH(w)...ON                               | 0.0128                 | 0.0492                         | -0.0089             | 0.0106              | 0.0017              | -2.79           | -6.58                                   | 2.2666  |
| OH(w)...NH <sub>2</sub>                  | 0.0141                 | 0.0466                         | -0.0082             | 0.0099              | 0.0017              | -2.57           |                                         | 2.3155  |
| <b><i>m-a1wd</i></b>                     |                        |                                |                     |                     |                     |                 |                                         |         |
| CH...OS                                  | 0.0104                 | 0.0373                         | -0.0069             | 0.0081              | 0.0012              | -2.16           |                                         | 2.9082  |
| OH(w)...ON                               | 0.0135                 | 0.0489                         | -0.0100             | 0.0111              | 0.0011              | -3.14           | -4.65                                   | 2.3450  |
| OH(w)...CH <sub>phenyl</sub>             | 0.0103                 | 0.0315                         | -0.0048             | 0.0064              | 0.0016              | -1.51           |                                         | 2.5026  |
| <b><i>m-a1wi</i></b>                     |                        |                                |                     |                     |                     |                 |                                         |         |
| CH...OS                                  | 0.0122                 | 0.0437                         | -0.0084             | 0.0096              | 0.0012              | -2.64           |                                         | 2.6409  |
| CH <sub>phenyl</sub> ...O(w)             | 0.0114                 | 0.0362                         | -0.0066             | 0.0078              | 0.0012              | -2.07           |                                         | 2.3866  |
| OH(w)...OS                               | 0.0218                 | 0.0874                         | -0.0173             | 0.0196              | 0.0023              | -5.43           | -8.06                                   | 2.0202  |
| OH(w)...CH <sup>c</sup>                  | 0.0034                 | 0.0121                         | -0.0018             | 0.0024              | 0.0006              | -0.56           |                                         | 3.9494  |
| <b><i>m-i3wa</i></b>                     |                        |                                |                     |                     |                     |                 |                                         |         |
| CH...OS                                  | 0.0143                 | 0.0528                         | -0.0100             | 0.0116              | 0.0016              | -3.14           |                                         | 2.5768  |
| NH...O(w)                                | 0.0238                 | 0.0970                         | -0.0186             | 0.0214              | 0.0028              | -5.84           | -12.37                                  | 1.9933  |
| OH(w)...NS                               | 0.0272                 | 0.0915                         | -0.0208             | 0.0218              | 0.0010              | -6.53           |                                         | 1.9968  |
| <b><i>m-i3wb</i></b>                     |                        |                                |                     |                     |                     |                 |                                         |         |
| CH...OS                                  | 0.0160                 | 0.0603                         | -0.0113             | 0.0132              | 0.0019              | -3.55           |                                         | 2.4501  |
| NH...O(w)                                | 0.0246                 | 0.0992                         | -0.0193             | 0.0221              | 0.0028              | -6.06           | -13.15                                  | 1.9873  |
| OH(w)...NS                               | 0.0291                 | 0.0947                         | -0.0226             | 0.0231              | 0.0005              | -7.09           |                                         | 1.9708  |
| <b><i>m-i3wc</i></b>                     |                        |                                |                     |                     |                     |                 |                                         |         |
| CH...OS                                  | 0.0176                 | 0.0687                         | -0.0127             | 0.0149              | 0.0022              | -3.98           |                                         | 2.3777  |
| CH <sub>phenyl</sub> ...O(w)             | 0.0101                 | 0.0300                         | -0.0058             | 0.0066              | 0.0008              | -1.82           |                                         | 2.4699  |
| OH(w)...OS                               | 0.0142                 | 0.0508                         | -0.0105             | 0.0116              | 0.0011              | -3.29           | -9.19                                   | 2.3500  |
| OH(w)...NS                               | 0.0193                 | 0.0666                         | -0.0130             | 0.0148              | 0.0018              | -4.08           |                                         | 2.1680  |

<sup>b</sup> bond path goes actually to the C atom; <sup>c</sup> bond path O↔C



Table S15: Summary of the QTAIM results regarding the non-covalent interactions in the isomers of the amido and imido tautomers of **sulfisoxazole-H<sub>2</sub>O**. Atomic units are used except for the energy of the hydrogen bonds (kcal/mol). The geometries were optimized and the wave functions were derived at the **M05-2X/6-311++G(d,p)** level of theory

| Interaction                                 | $\rho(r_{\text{BCP}})$ | $\nabla^2\rho(r_{\text{BCP}})$ | $V(r_{\text{BCP}})$ | $G(r_{\text{BCP}})$ | $H(r_{\text{BCP}})$ | $E_{\text{HB}}$ | $\sum_i E_{\text{HB}}^{\text{inter},i}$ | BPL (Å) |
|---------------------------------------------|------------------------|--------------------------------|---------------------|---------------------|---------------------|-----------------|-----------------------------------------|---------|
| <b><i>i-a1wb</i></b>                        |                        |                                |                     |                     |                     |                 |                                         |         |
| methylCH...OS                               | 0.0083                 | 0.0316                         | -0.0056             | 0.0068              | 0.0012              | -1.76           |                                         | 3.0489  |
| NH...O(w)                                   | 0.0214                 | 0.0834                         | -0.0159             | 0.0184              | 0.0025              | -4.99           |                                         | 2.0371  |
| CH <sub>phenyl</sub> ...O(w)                | 0.0070                 | 0.0234                         | -0.0043             | 0.0051              | 0.0008              | -1.35           | -12.52                                  | 2.6039  |
| OH(w)...OS                                  | 0.0239                 | 0.0973                         | -0.0197             | 0.0220              | 0.0023              | -6.18           |                                         | 2.0009  |
| <b><i>i-a1wc</i></b>                        |                        |                                |                     |                     |                     |                 |                                         |         |
| methylCH...OS <sup>b</sup>                  | 0.0074                 | 0.0292                         | -0.0051             | 0.0062              | 0.0011              | -1.60           |                                         | 3.3817  |
| CH <sub>phenyl</sub> ...O(w) <sup>b</sup>   | 0.0063                 | 0.0250                         | -0.0041             | 0.0052              | 0.0011              | -1.29           |                                         | 3.4196  |
| NH <sub>anilinic</sub> ...O(w)              | 0.0153                 | 0.0552                         | -0.0104             | 0.0121              | 0.0017              | -3.26           | -9.19                                   | 2.2469  |
| OH(w)...NO                                  | 0.0221                 | 0.0775                         | -0.0148             | 0.0171              | 0.0023              | -4.64           |                                         | 2.0598  |
| <b><i>i-a1wa</i></b>                        |                        |                                |                     |                     |                     |                 |                                         |         |
| methylCH...OS <sup>b</sup>                  | 0.0084                 | 0.0327                         | -0.0058             | 0.0070              | 0.0012              | -1.82           |                                         | 3.4081  |
| NH...O(w)                                   | 0.0219                 | 0.0861                         | -0.0166             | 0.0191              | 0.0025              | -5.21           |                                         | 2.0328  |
| CH <sub>phenyl</sub> ...O(w)                | 0.0055                 | 0.0201                         | -0.0032             | 0.0041              | 0.0009              | -1.00           | -9.94                                   | 3.1100  |
| OH(w)...ON                                  | 0.0158                 | 0.0650                         | -0.0119             | 0.0141              | 0.0022              | -3.73           |                                         | 2.2051  |
| <b><i>i-a1wd</i></b>                        |                        |                                |                     |                     |                     |                 |                                         |         |
| methylCH...OS                               | 0.0072                 | 0.0271                         | -0.0047             | 0.0058              | 0.0011              | -1.47           |                                         | 3.1559  |
| CH <sub>phenyl</sub> ...O(w) <sup>b,f</sup> | 0.0062                 | 0.0211                         | -0.0036             | 0.0044              | 0.0008              | -1.13           |                                         | 3.3050  |
| OH(w)...NH <sub>2</sub>                     | 0.0137                 | 0.0450                         | -0.0084             | 0.0098              | 0.0014              | -2.64           | -7.69                                   | 2.3506  |
| OH(w)...NO                                  | 0.0196                 | 0.0708                         | -0.0125             | 0.0151              | 0.0026              | -3.92           |                                         | 2.1131  |
| <b><i>i-a1wf</i></b>                        |                        |                                |                     |                     |                     |                 |                                         |         |
| methylCH...OS <sup>b</sup>                  | 0.0081                 | 0.0340                         | -0.0058             | 0.0072              | 0.0014              | -1.82           |                                         | 3.0809  |
| NH...O(w)                                   | 0.0195                 | 0.0694                         | -0.0137             | 0.0155              | 0.0018              | -4.30           |                                         | 2.1387  |
| OH(w)...CH <sub>phenyl</sub>                | 0.0081                 | 0.0254                         | -0.0044             | 0.0054              | 0.0010              | -1.38           | -9.48                                   | 2.8050  |
| OH(w)...ON                                  | 0.0161                 | 0.0684                         | -0.0121             | 0.0141              | 0.0020              | -3.80           |                                         | 2.1998  |
| <b><i>i-a2wa</i></b>                        |                        |                                |                     |                     |                     |                 |                                         |         |
| methylCH...CS                               | 0.0059                 | 0.0188                         | -0.0032             | 0.0040              | 0.0008              | -1.00           |                                         | 3.3799  |
| methylCH...CH <sub>phenyl</sub>             | 0.0059                 | 0.0168                         | -0.0029             | 0.0035              | 0.0006              | -0.91           |                                         | 3.3833  |
| CH <sub>phenyl</sub> ...O(w)                | 0.0118                 | 0.0403                         | -0.0070             | 0.0085              | 0.0015              | -2.20           |                                         | 2.3427  |
| OH(w)...OS                                  | 0.0201                 | 0.0846                         | -0.0158             | 0.0185              | 0.0027              | -4.96           | -9.45                                   | 2.0355  |
| OH(w)...NO                                  | 0.0118                 | 0.0398                         | -0.0073             | 0.0086              | 0.0013              | -2.29           |                                         | 2.4214  |
| <b><i>i-a2wb</i></b>                        |                        |                                |                     |                     |                     |                 |                                         |         |
| methylCH...CS                               | 0.0064                 | 0.0194                         | -0.0033             | 0.0041              | 0.0008              | -1.04           |                                         | 3.1684  |
| methylCH...CH <sub>phenyl</sub>             | 0.0056                 | 0.0165                         | -0.0028             | 0.0035              | 0.0007              | -0.88           |                                         | 3.1221  |
| NH...O(w)                                   | 0.0255                 | 0.0968                         | -0.0200             | 0.0221              | 0.0021              | -6.28           | -11.74                                  | 1.9617  |
| OH(w)...OS                                  | 0.0217                 | 0.0852                         | -0.0174             | 0.0194              | 0.0020              | -5.46           |                                         | 2.0598  |
| <b><i>i-i1wa</i></b>                        |                        |                                |                     |                     |                     |                 |                                         |         |
| NH...O(w)                                   | 0.0191                 | 0.0756                         | -0.0141             | 0.0165              | 0.0024              | -4.42           |                                         | 2.1286  |
| OH(w)...OS                                  | 0.0229                 | 0.0950                         | -0.0183             | 0.0210              | 0.0027              | -5.74           | -13.80                                  | 1.9562  |
| OH(w)...ON <sup>c</sup>                     | 0.0139                 | 0.0626                         | -0.0116             | 0.0136              | 0.0020              | -3.64           |                                         | 2.7284  |
| <b><i>i-i1wb</i></b>                        |                        |                                |                     |                     |                     |                 |                                         |         |
| CH <sub>phenyl</sub> ...O(w)                | 0.0060                 | 0.0189                         | -0.0035             | 0.0041              | 0.0006              | -1.10           |                                         | 2.7738  |
| OH(w)...OS                                  | 0.0179                 | 0.0658                         | -0.0134             | 0.0149              | 0.0015              | -4.20           | -8.34                                   | 2.1571  |
| OH(w)...NS                                  | 0.0151                 | 0.0479                         | -0.0097             | 0.0108              | 0.0011              | -3.04           |                                         | 2.3503  |
| <b><i>i-i2wa</i></b>                        |                        |                                |                     |                     |                     |                 |                                         |         |
| methylCH...OS <sup>d</sup>                  | 0.0118                 | 0.0388                         | -0.0076             | 0.0087              | 0.0011              | -2.38           |                                         | 2.5060  |
| methylCH...OS <sup>e</sup>                  | 0.0120                 | 0.0397                         | -0.0078             | 0.0089              | 0.0011              | -2.45           |                                         | 2.5103  |
| OH(w)...CS <sup>f</sup>                     | 0.0070                 | 0.0228                         | -0.0041             | 0.0049              | 0.0008              | -1.29           | -5.59                                   | 3.5700  |
| OH(w)...NS                                  | 0.0205                 | 0.0724                         | -0.0137             | 0.0159              | 0.0022              | -4.30           |                                         | 2.1095  |
| <b><i>i-i2wb</i></b>                        |                        |                                |                     |                     |                     |                 |                                         |         |
| methylCH...OS <sup>d</sup>                  | 0.0121                 | 0.0400                         | -0.0079             | 0.0089              | 0.0010              | -2.48           |                                         | 2.4917  |
| methylCH...OS <sup>e</sup>                  | 0.0120                 | 0.0396                         | -0.0078             | 0.0089              | 0.0011              | -2.45           |                                         | 2.5093  |
| CH <sub>phenyl</sub> ...O(w)                | 0.0057                 | 0.0227                         | -0.0034             | 0.0046              | 0.0012              | -1.07           | -5.74                                   | 3.1715  |
| OH(w)...NS                                  | 0.0217                 | 0.0757                         | -0.0149             | 0.0169              | 0.0020              | -4.67           |                                         | 2.0891  |

Table S15 (continued): Summary of the QTAIM results regarding the non-covalent interactions in the isomers of the amido and imido tautomers of **sulfisoxazole-H<sub>2</sub>O**. Atomic units are used except for the energy of the hydrogen bonds (kcal/mol). The geometries were optimized and the wave functions were derived at the **M05-2X/6-311++G(d,p)** level of theory

| <i>i-i2wc</i>                          |        |        |         |        |        |       |       |        |
|----------------------------------------|--------|--------|---------|--------|--------|-------|-------|--------|
| methylCH $\cdots$ OS                   | 0.0150 | 0.0560 | -0.0106 | 0.0123 | 0.0017 | -3.33 |       | 2.4718 |
| methylCH $\cdots$ CH <sub>phenyl</sub> | 0.0077 | 0.0222 | -0.0037 | 0.0047 | 0.0010 | -1.16 |       | 2.8466 |
| CH <sub>phenyl</sub> $\cdots$ O(w)     | 0.0109 | 0.0327 | -0.0063 | 0.0072 | 0.0009 | -1.98 |       | 2.4308 |
| OH(w) $\cdots$ OS                      | 0.0148 | 0.0528 | -0.0109 | 0.0121 | 0.0012 | -3.42 | -9.42 | 2.3085 |
| OH(w) $\cdots$ NS                      | 0.0187 | 0.0644 | -0.0128 | 0.0144 | 0.0016 | -4.02 |       | 2.1982 |
| <i>i-i2wd</i>                          |        |        |         |        |        |       |       |        |
| methylCH $\cdots$ OS                   | 0.0151 | 0.0556 | -0.0105 | 0.0122 | 0.0017 | -3.29 |       | 2.4458 |
| methylCH $\cdots$ CH <sub>phenyl</sub> | 0.0079 | 0.0227 | -0.0038 | 0.0047 | 0.0009 | -1.19 |       | 2.8670 |
| CH <sub>phenyl</sub> $\cdots$ O(w)     | 0.0108 | 0.0321 | -0.0062 | 0.0071 | 0.0009 | -1.95 |       | 2.4399 |
| OH(w) $\cdots$ OS                      | 0.0150 | 0.0539 | -0.0111 | 0.0123 | 0.0012 | -3.48 | -9.35 | 2.2908 |
| OH(w) $\cdots$ NS                      | 0.0184 | 0.0634 | -0.0125 | 0.0142 | 0.0017 | -3.92 |       | 2.2080 |
| <i>i-i2we</i>                          |        |        |         |        |        |       |       |        |
| methylCH $\cdots$ OS <sup>b</sup>      | 0.0154 | 0.0662 | -0.0121 | 0.0143 | 0.0022 | -3.80 |       | 2.9283 |
| OH(w) $\cdots$ CH <sub>phenyl</sub>    | 0.0078 | 0.0238 | -0.0040 | 0.0050 | 0.0010 | -1.26 |       | 2.7506 |
| OH(w) $\cdots$ ON <sup>c</sup>         | 0.0113 | 0.0453 | -0.0087 | 0.0100 | 0.0013 | -2.73 | -3.99 | 2.9888 |

<sup>b</sup> bond path goes to the C atom; <sup>c</sup> bond path connects O atoms; <sup>d,e</sup> same/opposite side as heterocycle H atom from NH group, resp.; <sup>f</sup> bond path goes to the O atom

Table S16: Summary of the QTAIM results regarding the non-covalent interactions in the isomers of the amido and imido tautomers of **sulfamethoxazole-H<sub>2</sub>O**. Atomic units are used except for the energy of the hydrogen bonds (kcal/mol). The geometries were optimized and the wave functions were derived at the **B3LYP/6-311++G(d,p)** level of theory

| Interaction                         | $\rho(\mathbf{r}_{\text{BCP}})$ | $\nabla^2\rho(\mathbf{r}_{\text{BCP}})$ | $V(\mathbf{r}_{\text{BCP}})$ | $G(\mathbf{r}_{\text{BCP}})$ | $H(\mathbf{r}_{\text{BCP}})$ | $E_{\text{HB}}$ | $\sum_i E_{\text{HB}}^{\text{inter},i}$ | BPL (Å) |
|-------------------------------------|---------------------------------|-----------------------------------------|------------------------------|------------------------------|------------------------------|-----------------|-----------------------------------------|---------|
| <i>m-a1wa</i>                       |                                 |                                         |                              |                              |                              |                 |                                         |         |
| CH $\cdots$ OS                      | 0.0104                          | 0.0375                                  | -0.0067                      | 0.0081                       | 0.0014                       | -2.10           |                                         | 2.6876  |
| NH $\cdots$ O(w)                    | 0.0237                          | 0.0838                                  | -0.0170                      | 0.0190                       | 0.0020                       | -5.33           |                                         | 2.0097  |
| OH(w) $\cdots$ NO                   | 0.0239                          | 0.0806                                  | -0.0164                      | 0.0183                       | 0.0019                       | -5.15           | -10.48                                  | 2.0588  |
| <i>m-a1wb</i>                       |                                 |                                         |                              |                              |                              |                 |                                         |         |
| CH $\cdots$ OS                      | 0.0094                          | 0.0334                                  | -0.0060                      | 0.0072                       | 0.0012                       | -1.88           |                                         | 2.7701  |
| NH $\cdots$ O(w)                    | 0.0206                          | 0.0739                                  | -0.0142                      | 0.0163                       | 0.0021                       | -4.46           |                                         | 2.0684  |
| CH <sub>phenyl</sub> $\cdots$ O(w)  | 0.0060                          | 0.0203                                  | -0.0036                      | 0.0043                       | 0.0007                       | -1.13           | -10.99                                  | 2.6529  |
| OH(w) $\cdots$ OS                   | 0.0225                          | 0.0865                                  | -0.0172                      | 0.0194                       | 0.0022                       | -5.40           |                                         | 2.0275  |
| <i>m-a1wc</i>                       |                                 |                                         |                              |                              |                              |                 |                                         |         |
| CH $\cdots$ OS                      | 0.0109                          | 0.0395                                  | -0.0071                      | 0.0085                       | 0.0014                       | -2.23           |                                         | 2.6771  |
| NH $\cdots$ O(w)                    | 0.0222                          | 0.0804                                  | -0.0158                      | 0.0179                       | 0.0021                       | -4.96           |                                         | 2.0299  |
| OH(w) $\cdots$ NO                   | 0.0245                          | 0.0830                                  | -0.0171                      | 0.0189                       | 0.0018                       | -5.37           | -10.33                                  | 2.0450  |
| <i>m-a3wa</i>                       |                                 |                                         |                              |                              |                              |                 |                                         |         |
| phenylCH $\cdots$ ON                | 0.0066                          | 0.0225                                  | -0.0034                      | 0.0045                       | 0.0011                       | -1.07           |                                         | 3.1485  |
| NH $\cdots$ O(w)                    | 0.0245                          | 0.0887                                  | -0.0178                      | 0.0200                       | 0.0022                       | -5.58           |                                         | 1.9788  |
| OH(w) $\cdots$ OS                   | 0.0246                          | 0.0924                                  | -0.0192                      | 0.0212                       | 0.0020                       | -6.02           | -11.60                                  | 1.9850  |
| <i>m-a1wh</i>                       |                                 |                                         |                              |                              |                              |                 |                                         |         |
| CH $\cdots$ OS                      | 0.0095                          | 0.0346                                  | -0.0061                      | 0.0074                       | 0.0013                       | -1.91           |                                         | 2.8044  |
| methylCH $\cdots$ O(w)              | 0.0058                          | 0.0208                                  | -0.0036                      | 0.0044                       | 0.0008                       | -1.13           |                                         | 2.6909  |
| OH(w) $\cdots$ ON                   | 0.0178                          | 0.0705                                  | -0.0124                      | 0.0150                       | 0.0026                       | -3.89           | -5.02                                   | 2.0903  |
| <i>m-a1wd</i>                       |                                 |                                         |                              |                              |                              |                 |                                         |         |
| CH $\cdots$ OS                      | 0.0090                          | 0.0333                                  | -0.0058                      | 0.0071                       | 0.0013                       | -1.82           |                                         | 3.0113  |
| OH(w) $\cdots$ ON                   | 0.0110                          | 0.0381                                  | -0.0072                      | 0.0084                       | 0.0012                       | -2.26           |                                         | 2.3630  |
| OH(w) $\cdots$ CH <sub>phenyl</sub> | 0.0055                          | 0.0147                                  | -0.0023                      | 0.0030                       | 0.0007                       | -0.72           | -2.98                                   | 2.8704  |
| <i>m-a1wi</i>                       |                                 |                                         |                              |                              |                              |                 |                                         |         |
| CH $\cdots$ OS                      | 0.0095                          | 0.0335                                  | -0.0061                      | 0.0072                       | 0.0011                       | -1.91           |                                         | 2.7257  |
| CH <sub>phenyl</sub> $\cdots$ O(w)  | 0.0116                          | 0.0397                                  | -0.0068                      | 0.0084                       | 0.0016                       | -2.13           |                                         | 2.3444  |
| OH(w) $\cdots$ OS                   | 0.0226                          | 0.0896                                  | -0.0171                      | 0.0198                       | 0.0027                       | -5.37           | -7.50                                   | 1.9791  |
| <i>m-i3wa</i>                       |                                 |                                         |                              |                              |                              |                 |                                         |         |
| CH $\cdots$ OS                      | 0.0132                          | 0.0476                                  | -0.0087                      | 0.0103                       | 0.0016                       | -2.73           |                                         | 2.5395  |
| NH $\cdots$ O(w)                    | 0.0247                          | 0.0918                                  | -0.0182                      | 0.0206                       | 0.0024                       | -5.71           |                                         | 1.9926  |
| OH(w) $\cdots$ NS                   | 0.0269                          | 0.0837                                  | -0.0190                      | 0.0199                       | 0.0009                       | -5.96           | -11.67                                  | 2.0115  |

Table S17: Summary of the QTAIM results regarding the non-covalent interactions in the isomers of the amido and imido tautomers of **sulfamethoxazole-H<sub>2</sub>O**. Atomic units are used except for the energy of the hydrogen bonds (kcal/mol). The geometries were optimized and the wave functions were derived at the **M06-2X/6-311++G(d,p)** level of theory

| Interaction                              | $\rho(r_{\text{BCP}})$ | $\nabla^2\rho(r_{\text{BCP}})$ | $V(r_{\text{BCP}})$ | $G(r_{\text{BCP}})$ | $H(r_{\text{BCP}})$ | $E_{\text{HB}}$ | $\sum_i E_{\text{HB}}^{\text{inter},i}$ | BPL (Å) |
|------------------------------------------|------------------------|--------------------------------|---------------------|---------------------|---------------------|-----------------|-----------------------------------------|---------|
| <b><i>m-a1wa</i></b>                     |                        |                                |                     |                     |                     |                 |                                         |         |
| CH...OS                                  | 0.0107                 | 0.0379                         | -0.0071             | 0.0083              | 0.0012              | -2.23           |                                         | 2.7557  |
| NH...O(w)                                | 0.0227                 | 0.0889                         | -0.0175             | 0.0198              | 0.0023              | -5.49           |                                         | 2.0212  |
| CH <sub>phenyl</sub> ...O(w)             | 0.0083                 | 0.0280                         | -0.0051             | 0.0060              | 0.0009              | -1.60           | -12.36                                  | 2.5840  |
| OH(w)...NO                               | 0.0229                 | 0.0845                         | -0.0168             | 0.0189              | 0.0021              | -5.27           |                                         | 2.0669  |
| <b><i>m-a1wb</i></b>                     |                        |                                |                     |                     |                     |                 |                                         |         |
| CH...OS                                  | 0.0108                 | 0.0386                         | -0.0072             | 0.0084              | 0.0012              | -2.26           |                                         | 2.7409  |
| NH...O(w)                                | 0.0215                 | 0.0848                         | -0.0162             | 0.0184              | 0.0022              | -5.08           |                                         | 2.0363  |
| CH <sub>phenyl</sub> ...O(w)             | 0.0095                 | 0.0328                         | -0.0059             | 0.0070              | 0.0011              | -1.85           | -12.92                                  | 2.4418  |
| OH(w)...OS                               | 0.0230                 | 0.0957                         | -0.0191             | 0.0215              | 0.0024              | -5.99           |                                         | 2.0193  |
| <b><i>m-a1wc</i></b>                     |                        |                                |                     |                     |                     |                 |                                         |         |
| CH...OS <sup>b</sup>                     | 0.0117                 | 0.0444                         | -0.0082             | 0.0097              | 0.0015              | -2.57           |                                         | 3.1686  |
| NH...O(w)                                | 0.0199                 | 0.0723                         | -0.0143             | 0.0162              | 0.0019              | -4.49           |                                         | 2.1262  |
| OH(w)...CH <sub>phenyl</sub>             | 0.0078                 | 0.0251                         | -0.0043             | 0.0053              | 0.0010              | -1.35           | -10.58                                  | 2.9034  |
| OH(w)...NO                               | 0.0211                 | 0.0778                         | -0.0151             | 0.0173              | 0.0022              | -4.74           |                                         | 2.1148  |
| <b><i>m-a3wa</i></b>                     |                        |                                |                     |                     |                     |                 |                                         |         |
| phenylCH...ON <sup>b</sup>               | 0.0085                 | 0.0292                         | -0.0047             | 0.0060              | 0.0013              | -1.47           |                                         | 3.1833  |
| NH...O(w)                                | 0.0235                 | 0.0947                         | -0.0184             | 0.0210              | 0.0026              | -5.77           | -12.74                                  | 1.9812  |
| OH(w)...OS                               | 0.0259                 | 0.1072                         | -0.0222             | 0.0245              | 0.0023              | -6.97           |                                         | 1.9495  |
| <b><i>m-a1wf</i></b>                     |                        |                                |                     |                     |                     |                 |                                         |         |
| anilinicNH...O(w) <sup>c</sup>           | 0.0084                 | 0.0305                         | -0.0058             | 0.0067              | 0.0009              | -1.82           |                                         | 3.2331  |
| OH(w)...NO                               | 0.0154                 | 0.0554                         | -0.0093             | 0.0116              | 0.0023              | -2.92           | -6.53                                   | 2.2249  |
| O(w)...CH <sub>phenyl</sub> <sup>b</sup> | 0.0089                 | 0.0349                         | -0.0057             | 0.0072              | 0.0015              | -1.79           |                                         | 3.2408  |
| <b><i>m-a1we</i></b>                     |                        |                                |                     |                     |                     |                 |                                         |         |
| anilinicNH...O(w) <sup>c</sup>           | 0.0077                 | 0.0289                         | -0.0054             | 0.0063              | 0.0009              | -1.69           |                                         | 3.2179  |
| OH(w)...NO                               | 0.0120                 | 0.0417                         | -0.0071             | 0.0088              | 0.0017              | -2.23           | -5.68                                   | 2.3602  |
| O(w)...CH <sub>phenyl</sub> <sup>b</sup> | 0.0090                 | 0.0338                         | -0.0056             | 0.0070              | 0.0014              | -1.76           |                                         | 3.1504  |
| <b><i>m-a1wg</i></b>                     |                        |                                |                     |                     |                     |                 |                                         |         |
| methylCH...O(w)                          | 0.0078                 | 0.0273                         | -0.0049             | 0.0059              | 0.0010              | -1.54           |                                         | 2.5730  |
| OH(w)...ON                               | 0.0144                 | 0.0564                         | -0.0104             | 0.0122              | 0.0018              | -3.26           | -7.53                                   | 2.2225  |
| OH(w)...NH <sub>2</sub>                  | 0.0144                 | 0.0488                         | -0.0087             | 0.0104              | 0.0017              | -2.73           |                                         | 2.3032  |
| <b><i>m-a1wd</i></b>                     |                        |                                |                     |                     |                     |                 |                                         |         |
| CH...OS                                  | 0.0106                 | 0.0380                         | -0.0071             | 0.0083              | 0.0012              | -2.23           |                                         | 2.8150  |
| OH(w)...ON                               | 0.0139                 | 0.0510                         | -0.0105             | 0.0116              | 0.0011              | -3.29           | -4.92                                   | 2.3749  |
| OH(w)...CH <sub>phenyl</sub>             | 0.0105                 | 0.0336                         | -0.0052             | 0.0068              | 0.0016              | -1.63           |                                         | 2.5226  |
| <b><i>m-a1wi</i></b>                     |                        |                                |                     |                     |                     |                 |                                         |         |
| CH...OS                                  | 0.0125                 | 0.0448                         | -0.0086             | 0.0099              | 0.0013              | -2.70           |                                         | 2.6284  |
| CH <sub>phenyl</sub> ...O(w)             | 0.0119                 | 0.0383                         | -0.0071             | 0.0083              | 0.0012              | -2.23           |                                         | 2.3693  |
| OH(w)...OS                               | 0.0217                 | 0.0873                         | -0.0173             | 0.0196              | 0.0023              | -5.43           | -9.77                                   | 2.0264  |
| OH(w)...CH                               | 0.0049                 | 0.0165                         | -0.0026             | 0.0034              | 0.0008              | -0.82           |                                         | 3.1100  |
| OH(w)...NS <sup>d</sup>                  | 0.0064                 | 0.0209                         | -0.0041             | 0.0047              | 0.0006              | -1.29           |                                         | 3.3643  |
| <b><i>m-i3wa</i></b>                     |                        |                                |                     |                     |                     |                 |                                         |         |
| CH...OS                                  | 0.0148                 | 0.0558                         | -0.0104             | 0.0122              | 0.0018              | -3.26           |                                         | 2.5233  |
| NH...O(w)                                | 0.0244                 | 0.1010                         | -0.0195             | 0.0224              | 0.0029              | -6.12           | -12.55                                  | 1.9768  |
| OH(w)...NS                               | 0.0267                 | 0.0925                         | -0.0205             | 0.0218              | 0.0013              | -6.43           |                                         | 2.0016  |
| <b><i>m-i3wb</i></b>                     |                        |                                |                     |                     |                     |                 |                                         |         |
| CH...OS                                  | 0.0155                 | 0.0588                         | -0.0109             | 0.0128              | 0.0019              | -3.42           |                                         | 2.4615  |
| NH...O(w)                                | 0.0253                 | 0.1033                         | -0.0203             | 0.0230              | 0.0027              | -6.37           | -13.40                                  | 1.9710  |
| OH(w)...NS                               | 0.0286                 | 0.0959                         | -0.0224             | 0.0232              | 0.0008              | -7.03           |                                         | 1.9742  |
| <b><i>m-i3wc</i></b>                     |                        |                                |                     |                     |                     |                 |                                         |         |
| CH...OS                                  | 0.0167                 | 0.0655                         | -0.0120             | 0.0142              | 0.0022              | -3.77           |                                         | 2.3982  |
| CH <sub>phenyl</sub> ...O(w)             | 0.0107                 | 0.0326                         | -0.0063             | 0.0072              | 0.0009              | -1.98           |                                         | 2.4392  |
| OH(w)...OS                               | 0.0140                 | 0.0505                         | -0.0105             | 0.0116              | 0.0009              | -3.29           | -9.66                                   | 2.3863  |
| OH(w)...NS                               | 0.0201                 | 0.0717                         | -0.0140             | 0.0159              | 0.0019              | -4.39           |                                         | 2.1380  |

<sup>b</sup> bond path goes to the C atom; <sup>c</sup> bond path goes to the N atom; <sup>d</sup> bond path connects O and N

Table S18: Summary of the QTAIM results regarding the non-covalent interactions in the isomers of the amido and imido tautomers of **sulfisoxazole-H<sub>2</sub>O**. Atomic units are used except for the energy of the hydrogen bonds (kcal/mol). The geometries were optimized and the wave functions were derived at the **B3LYP/6-311++G(d,p)** level of theory

| Interaction                     | $\rho(r_{\text{BCP}})$ | $\nabla^2\rho(r_{\text{BCP}})$ | $V(r_{\text{BCP}})$ | $G(r_{\text{BCP}})$ | $H(r_{\text{BCP}})$ | $E_{\text{HB}}$ | $\sum_i E_{\text{HB}}^{\text{inter},i}$ | BPL (Å) |
|---------------------------------|------------------------|--------------------------------|---------------------|---------------------|---------------------|-----------------|-----------------------------------------|---------|
| <b><i>i-a1wb</i></b>            |                        |                                |                     |                     |                     |                 |                                         |         |
| methylCH...OS                   | 0.0066                 | 0.0235                         | -0.0041             | 0.0050              | 0.0009              | -1.29           |                                         | 2.8681  |
| NH...O(w)                       | 0.0215                 | 0.0774                         | -0.0150             | 0.0172              | 0.0022              | -4.71           |                                         | 2.0461  |
| CH <sub>phenyl</sub> ...O(w)    | 0.0047                 | 0.0162                         | -0.0028             | 0.0034              | 0.0006              | -0.88           | -11.17                                  | 2.7827  |
| OH(w)...OS                      | 0.0231                 | 0.0885                         | -0.0178             | 0.0199              | 0.0021              | -5.58           |                                         | 2.0128  |
| <b><i>i-a1we</i></b>            |                        |                                |                     |                     |                     |                 |                                         |         |
| methylCH...OS                   | 0.0065                 | 0.0238                         | -0.0041             | 0.0050              | 0.0009              | -1.29           |                                         | 2.9271  |
| methylCH...O(w)                 | 0.0047                 | 0.0171                         | -0.0028             | 0.0035              | 0.0007              | -0.88           | -6.46                                   | 2.8737  |
| OH(w)...NO                      | 0.0260                 | 0.0851                         | -0.0178             | 0.0196              | 0.0018              | -5.58           |                                         | 2.0037  |
| <b><i>i-a1wc</i></b>            |                        |                                |                     |                     |                     |                 |                                         |         |
| methylCH...OS                   | 0.0051                 | 0.0191                         | -0.0031             | 0.0039              | 0.0008              | -0.97           |                                         | 3.0938  |
| anilinicNH...O(w)               | 0.0106                 | 0.0350                         | -0.0066             | 0.0077              | 0.0011              | -2.07           | -5.99                                   | 2.4435  |
| OH(w)...NO                      | 0.0208                 | 0.0676                         | -0.0125             | 0.0147              | 0.0022              | -3.92           |                                         | 2.0993  |
| <b><i>i-a1wa</i></b>            |                        |                                |                     |                     |                     |                 |                                         |         |
| methylCH...OS                   | 0.0075                 | 0.0270                         | -0.0047             | 0.0057              | 0.0010              | -1.47           |                                         | 2.8294  |
| NH...O(w)                       | 0.0227                 | 0.0828                         | -0.0164             | 0.0185              | 0.0021              | -5.15           |                                         | 2.0204  |
| CH <sub>phenyl</sub> ...O(w)    | 0.0019                 | 0.0076                         | -0.0009             | 0.0014              | 0.0005              | -0.28           | -8.60                                   | 3.7423  |
| OH(w)...ON                      | 0.0143                 | 0.0551                         | -0.0101             | 0.0119              | 0.0018              | -3.17           |                                         | 2.2606  |
| <b><i>i-a1wf</i></b>            |                        |                                |                     |                     |                     |                 |                                         |         |
| methylCH...OS                   | 0.0069                 | 0.0255                         | -0.0044             | 0.0054              | 0.0010              | -1.38           |                                         | 2.9321  |
| NH...O(w)                       | 0.0219                 | 0.0832                         | -0.0159             | 0.0184              | 0.0025              | -4.99           | -8.03                                   | 2.0221  |
| OH(w)...ON                      | 0.0138                 | 0.0541                         | -0.0097             | 0.0116              | 0.0019              | -3.04           |                                         | 2.2820  |
| <b><i>i-a2wa</i></b>            |                        |                                |                     |                     |                     |                 |                                         |         |
| CH <sub>phenyl</sub> ...O(w)    | 0.0091                 | 0.0288                         | -0.0051             | 0.0062              | 0.0011              | -1.60           |                                         | 2.4779  |
| OH(w)...OS                      | 0.0196                 | 0.0785                         | -0.0144             | 0.0170              | 0.0026              | -4.52           | -5.78                                   | 2.0437  |
| OH(w)...NO                      | 0.0072                 | 0.0228                         | -0.0040             | 0.0049              | 0.0009              | -1.26           |                                         | 2.6573  |
| <b><i>i-a2wb</i></b>            |                        |                                |                     |                     |                     |                 |                                         |         |
| methylCH...CS                   | 0.0042                 | 0.0120                         | -0.0020             | 0.0025              | 0.0005              | -0.63           |                                         | 3.1543  |
| NH...O(w)                       | 0.0266                 | 0.0918                         | -0.0197             | 0.0213              | 0.0016              | -6.18           | -11.42                                  | 1.9536  |
| OH(w)...OS                      | 0.0219                 | 0.0824                         | -0.0167             | 0.0186              | 0.0019              | -5.24           |                                         | 2.0484  |
| <b><i>i-i1wa</i></b>            |                        |                                |                     |                     |                     |                 |                                         |         |
| NH...O(w)                       | 0.0170                 | 0.0624                         | -0.0115             | 0.0136              | 0.0021              | -3.61           |                                         | 2.1808  |
| OH(w)...OS                      | 0.0206                 | 0.0796                         | -0.0147             | 0.0173              | 0.0026              | -4.61           | -11.29                                  | 2.0110  |
| OH(w)...ON <sup>c</sup>         | 0.0122                 | 0.0536                         | -0.0098             | 0.0116              | 0.0018              | -3.07           |                                         | 2.7872  |
| <b><i>i-i2wb</i></b>            |                        |                                |                     |                     |                     |                 |                                         |         |
| methylCH...OS <sup>d</sup>      | 0.0101                 | 0.0318                         | -0.0062             | 0.0071              | 0.0009              | -1.95           |                                         | 2.5659  |
| methylCH...OS <sup>e</sup>      | 0.0101                 | 0.0325                         | -0.0062             | 0.0072              | 0.0010              | -1.95           |                                         | 2.5911  |
| OH(w)...NS                      | 0.0211                 | 0.0684                         | -0.0132             | 0.0151              | 0.0019              | -4.14           | -4.14                                   | 2.1050  |
| <b><i>i-i2wc</i></b>            |                        |                                |                     |                     |                     |                 |                                         |         |
| methylCH...HC <sub>methyl</sub> | 0.0090                 | 0.0343                         | -0.0051             | 0.0068              | 0.0017              | -1.60           |                                         | 2.5138  |
| methylCH...OS                   | 0.0140                 | 0.0511                         | -0.0093             | 0.0110              | 0.0017              | -2.92           |                                         | 2.4492  |
| methylCH...CH <sub>phenyl</sub> | 0.0047                 | 0.0138                         | -0.0022             | 0.0028              | 0.0006              | -0.69           |                                         | 2.9948  |
| CH <sub>phenyl</sub> ...O(w)    | 0.0092                 | 0.0254                         | -0.0050             | 0.0057              | 0.0007              | -1.57           |                                         | 2.5251  |
| OH(w)...OS                      | 0.0098                 | 0.0334                         | -0.0067             | 0.0075              | 0.0008              | -2.10           | -7.72                                   | 2.5870  |
| OH(w)...NS                      | 0.0201                 | 0.0653                         | -0.0129             | 0.0146              | 0.0017              | -4.05           |                                         | 2.1518  |
| <b><i>i-i2wd</i></b>            |                        |                                |                     |                     |                     |                 |                                         |         |
| methylCH...OS                   | 0.0148                 | 0.0537                         | -0.0098             | 0.0116              | 0.0018              | -3.07           |                                         | 2.3848  |
| methylCH...CH <sub>phenyl</sub> | 0.0044                 | 0.0132                         | -0.0020             | 0.0027              | 0.0007              | -0.63           |                                         | 3.0310  |
| CH <sub>phenyl</sub> ...O(w)    | 0.0089                 | 0.0247                         | -0.0049             | 0.0055              | 0.0006              | -1.54           |                                         | 2.5385  |
| OH(w)...OS                      | 0.0111                 | 0.0376                         | -0.0076             | 0.0085              | 0.0009              | -2.38           | -7.65                                   | 2.4732  |
| OH(w)...NS                      | 0.0189                 | 0.0613                         | -0.0119             | 0.0136              | 0.0017              | -3.73           |                                         | 2.1856  |

<sup>c</sup> bond path connects O atoms; <sup>d, e</sup> same/opposite side as heterocycle H atom from NH group, resp.

Table S19: Summary of the QTAIM results regarding the non-covalent interactions in the isomers of the amido and imido tautomers of **sulfisoxazole-H<sub>2</sub>O**. Atomic units are used except for the energy of the hydrogen bonds (kcal/mol). The geometries were optimized and the wave functions were derived at the **M06-2X/6-311++G(d,p)** level of theory

| Interaction                                 | $\rho(r_{\text{BCP}})$ | $\nabla^2\rho(r_{\text{BCP}})$ | $V(r_{\text{BCP}})$ | $G(r_{\text{BCP}})$ | $H(r_{\text{BCP}})$ | $E_{\text{HB}}$ | $\sum_i E_{\text{HB}}^{\text{inter},i}$ | BPL (Å) |
|---------------------------------------------|------------------------|--------------------------------|---------------------|---------------------|---------------------|-----------------|-----------------------------------------|---------|
| <b><i>i-a1wb</i></b>                        |                        |                                |                     |                     |                     |                 |                                         |         |
| methylCH...OS <sup>b</sup>                  | 0.0088                 | 0.0341                         | -0.0061             | 0.0073              | 0.0012              | -1.91           |                                         | 3.3495  |
| NH...O(w)                                   | 0.0219                 | 0.0869                         | -0.0167             | 0.0192              | 0.0025              | -5.24           |                                         | 2.0239  |
| CH <sub>phenyl</sub> ...O(w)                | 0.0079                 | 0.0266                         | -0.0049             | 0.0058              | 0.0009              | -1.54           | -12.90                                  | 2.5493  |
| OH(w)...OS                                  | 0.0234                 | 0.0976                         | -0.0195             | 0.0220              | 0.0025              | -6.12           |                                         | 2.0087  |
| <b><i>i-a1wc</i></b>                        |                        |                                |                     |                     |                     |                 |                                         |         |
| methylCH...OS <sup>b</sup>                  | 0.0079                 | 0.0309                         | -0.0054             | 0.0066              | 0.0012              | -1.69           |                                         | 3.2960  |
| CH <sub>phenyl</sub> ...O(w) <sup>b</sup>   | 0.0076                 | 0.0295                         | -0.0050             | 0.0062              | 0.0012              | -1.57           |                                         | 3.4683  |
| NH <sub>anilinic</sub> ...O(w)              | 0.0167                 | 0.0620                         | -0.0117             | 0.0136              | 0.0019              | -3.67           | -10.45                                  | 2.1987  |
| OH(w)...NO                                  | 0.0237                 | 0.0836                         | -0.0166             | 0.0187              | 0.0021              | -5.21           |                                         | 2.0278  |
| <b><i>i-a1wa</i></b>                        |                        |                                |                     |                     |                     |                 |                                         |         |
| methylCH...OS <sup>b</sup>                  | 0.0088                 | 0.0347                         | -0.0062             | 0.0074              | 0.0012              | -1.95           |                                         | 3.2718  |
| NH...O(w)                                   | 0.0226                 | 0.0904                         | -0.0176             | 0.0201              | 0.0025              | -5.52           |                                         | 2.0191  |
| CH <sub>phenyl</sub> ...O(w)                | 0.0066                 | 0.0238                         | -0.0040             | 0.0050              | 0.0010              | -1.26           | -10.70                                  | 3.2129  |
| OH(w)...ON                                  | 0.0163                 | 0.0680                         | -0.0125             | 0.0147              | 0.0022              | -3.92           |                                         | 2.1869  |
| <b><i>i-a1wd</i></b>                        |                        |                                |                     |                     |                     |                 |                                         |         |
| methylCH...OS <sup>a</sup>                  | 0.0075                 | 0.0289                         | -0.0051             | 0.0062              | 0.0011              | -1.60           |                                         | 3.3961  |
| CH <sub>phenyl</sub> ...O(w) <sup>b,f</sup> | 0.0074                 | 0.0244                         | -0.0044             | 0.0053              | 0.0009              | -1.38           |                                         | 3.2597  |
| OH(w)...NH <sub>2</sub>                     | 0.0144                 | 0.0487                         | -0.0092             | 0.0107              | 0.0015              | -2.89           | -8.66                                   | 2.3327  |
| OH(w)...NO                                  | 0.0209                 | 0.0765                         | -0.0140             | 0.0166              | 0.0026              | -4.39           |                                         | 2.0815  |
| <b><i>i-a1wf</i></b>                        |                        |                                |                     |                     |                     |                 |                                         |         |
| methylCH...OS <sup>b</sup>                  | 0.0088                 | 0.0367                         | -0.0064             | 0.0078              | 0.0014              | -2.01           |                                         | 3.0411  |
| NH...O(w)                                   | 0.0196                 | 0.0713                         | -0.0140             | 0.0159              | 0.0019              | -4.39           |                                         | 2.1348  |
| OH(w)...CH <sub>phenyl</sub>                | 0.0083                 | 0.0266                         | -0.0046             | 0.0056              | 0.0010              | -1.44           | -9.88                                   | 2.8737  |
| OH(w)...ON                                  | 0.0168                 | 0.0692                         | -0.0129             | 0.0151              | 0.0022              | -4.05           |                                         | 2.1735  |
| <b><i>i-a2wa</i></b>                        |                        |                                |                     |                     |                     |                 |                                         |         |
| methylCH...CS                               | 0.0064                 | 0.0198                         | -0.0034             | 0.0042              | 0.0008              | -1.07           |                                         | 3.1942  |
| methylCH...CH <sub>phenyl</sub>             | 0.0065                 | 0.0185                         | -0.0031             | 0.0039              | 0.0008              | -0.97           |                                         | 3.5200  |
| CH <sub>phenyl</sub> ...O(w)                | 0.0131                 | 0.0473                         | -0.0082             | 0.0100              | 0.0018              | -2.57           |                                         | 2.2855  |
| OH(w)...OS                                  | 0.0208                 | 0.0890                         | -0.0168             | 0.0195              | 0.0027              | -5.27           | -10.35                                  | 2.0187  |
| OH(w)...NO                                  | 0.0124                 | 0.0434                         | -0.0080             | 0.0094              | 0.0014              | -2.51           |                                         | 2.4001  |
| <b><i>i-a2wb</i></b>                        |                        |                                |                     |                     |                     |                 |                                         |         |
| methylCH...CS <sup>b</sup>                  | 0.0065                 | 0.0212                         | -0.0035             | 0.0044              | 0.0009              | -1.10           |                                         | 3.8181  |
| methylCH...CH <sub>phenyl</sub>             | 0.0063                 | 0.0184                         | -0.0032             | 0.0039              | 0.0007              | -1.00           |                                         | 3.1998  |
| NH...O(w)                                   | 0.0258                 | 0.0993                         | -0.0206             | 0.0227              | 0.0021              | -6.46           | -11.76                                  | 1.9571  |
| OH(w)...OS                                  | 0.0211                 | 0.0832                         | -0.0169             | 0.0188              | 0.0019              | -5.30           |                                         | 2.0768  |
| <b><i>i-i1wa</i></b>                        |                        |                                |                     |                     |                     |                 |                                         |         |
| NH...O(w)                                   | 0.0194                 | 0.0783                         | -0.0146             | 0.0171              | 0.0025              | -4.58           |                                         | 2.1211  |
| OH(w)...OS                                  | 0.0236                 | 0.0990                         | -0.0193             | 0.0220              | 0.0027              | -6.06           | -14.47                                  | 1.9414  |
| OH(w)...ON <sup>c</sup>                     | 0.0145                 | 0.0667                         | -0.0122             | 0.0144              | 0.0022              | -3.83           |                                         | 2.6997  |
| <b><i>i-i2wa</i></b>                        |                        |                                |                     |                     |                     |                 |                                         |         |
| methylCH...OS <sup>d</sup>                  | 0.0118                 | 0.0390                         | -0.0076             | 0.0087              | 0.0011              | -2.38           |                                         | 2.4915  |
| methylCH...OS <sup>e</sup>                  | 0.0120                 | 0.0405                         | -0.0079             | 0.0090              | 0.0011              | -2.48           |                                         | 2.5121  |
| OH(w)...CS <sup>f</sup>                     | 0.0074                 | 0.0244                         | -0.0044             | 0.0053              | 0.0009              | -1.38           | -5.80                                   | 3.5344  |
| OH(w)...NS                                  | 0.0207                 | 0.0743                         | -0.0141             | 0.0163              | 0.0022              | -4.42           |                                         | 2.1019  |
| <b><i>i-i2wb</i></b>                        |                        |                                |                     |                     |                     |                 |                                         |         |
| methylCH...OS <sup>d</sup>                  | 0.0120                 | 0.0401                         | -0.0078             | 0.0089              | 0.0011              | -2.45           |                                         | 2.4833  |
| methylCH...OS <sup>e</sup>                  | 0.0121                 | 0.0408                         | -0.0080             | 0.0091              | 0.0011              | -2.51           |                                         | 2.4971  |
| CH <sub>phenyl</sub> ...O(w)                | 0.0073                 | 0.0279                         | -0.0045             | 0.0058              | 0.0013              | -1.41           | -6.40                                   | 2.9096  |
| OH(w)...NS                                  | 0.0225                 | 0.0795                         | -0.0159             | 0.0179              | 0.0020              | -4.99           |                                         | 2.0708  |
| <b><i>i-i2wc</i></b>                        |                        |                                |                     |                     |                     |                 |                                         |         |
| methylCH...OS                               | 0.0149                 | 0.0566                         | -0.0105             | 0.0123              | 0.0017              | -3.29           |                                         | 2.4774  |
| methylCH...CH <sub>phenyl</sub>             | 0.0081                 | 0.0241                         | -0.0040             | 0.0050              | 0.0010              | -1.26           |                                         | 2.7460  |
| CH <sub>phenyl</sub> ...O(w)                | 0.0116                 | 0.0357                         | -0.0069             | 0.0079              | 0.0010              | -2.16           |                                         | 2.3993  |
| OH(w)...OS                                  | 0.0150                 | 0.0545                         | -0.0112             | 0.0124              | 0.0012              | -3.51           | -9.81                                   | 2.2958  |
| OH(w)...NS                                  | 0.0189                 | 0.0666                         | -0.0132             | 0.0149              | 0.0017              | -4.14           |                                         | 2.1870  |

Table S19 (continued): Summary of the QTAIM results regarding the non-covalent interactions in the isomers of the amido and imido tautomers of **sulfisoxazole-H<sub>2</sub>O**. Atomic units are used except for the energy of the hydrogen bonds (kcal/mol). The geometries were optimized and the wave functions were derived at the **M06-2X/6-311++G(d,p)** level of theory

| <i>i-i2wd</i>                                       |        |        |         |        |        |       |              |
|-----------------------------------------------------|--------|--------|---------|--------|--------|-------|--------------|
| methylCH $\cdots$ OS                                | 0.0150 | 0.0563 | -0.0105 | 0.0123 | 0.0017 | -3.29 | 2.4513       |
| methylCH $\cdots$ CH <sub>phenyl</sub>              | 0.0082 | 0.0244 | -0.0040 | 0.0051 | 0.0011 | -1.26 | 2.7615       |
| CH <sub>phenyl</sub> $\cdots$ O(w)                  | 0.0115 | 0.0353 | -0.0068 | 0.0078 | 0.0010 | -2.13 | 2.4052       |
| OH(w) $\cdots$ OS                                   | 0.0153 | 0.0558 | -0.0115 | 0.0127 | 0.0012 | -3.61 | -9.79 2.2761 |
| OH(w) $\cdots$ NS                                   | 0.0186 | 0.0653 | -0.0129 | 0.0146 | 0.0017 | -4.05 | 2.1988       |
| <i>i-i2we</i>                                       |        |        |         |        |        |       |              |
| methylCH $\cdots$ CH <sub>phenyl</sub> <sup>§</sup> | 0.0055 | 0.0167 | -0.0029 | 0.0035 | 0.0006 | -0.91 | 2.3577       |
| methylCH $\cdots$ OS <sup>b</sup>                   | 0.0149 | 0.0649 | -0.0118 | 0.0140 | 0.0022 | -3.70 | 2.8731       |
| OH(w) $\cdots$ CH <sub>phenyl</sub>                 | 0.0078 | 0.0236 | -0.0038 | 0.0049 | 0.0011 | -1.19 | -4.33 2.9960 |
| OH(w) $\cdots$ ON <sup>c</sup>                      | 0.0126 | 0.0514 | -0.0100 | 0.0114 | 0.0014 | -3.14 | 2.8315       |

<sup>b</sup> bond path goes to the C atom; <sup>c</sup> bond path connects O atoms; <sup>d,e</sup> same/opposite side as heterocycle H atom from NH group, resp.; <sup>f</sup> bond path goes to the O atom; <sup>§</sup> bond path connects the two H atoms

Table S20: Summary of the QTAIM results regarding the non-covalent interactions in the two isomers of the amido tautomers of **sulfamethoxazole-H<sub>2</sub>O** studied further with IQA analysis. Atomic units are except unless for the energy of the hydrogen bonds (kcal/mol). The geometries were optimized and the wave functions were derived using **6-311++G(3df,3pd)** as basis set

| Interaction                        | $\rho(r_{\text{BCP}})$ | $\nabla^2\rho(r_{\text{BCP}})$ | $V(r_{\text{BCP}})$ | $G(r_{\text{BCP}})$ | $H(r_{\text{BCP}})$ | $E_{\text{HB}}$ | $\sum_i E_{\text{HB}}^{\text{inter},i}$ | BPL (Å) |
|------------------------------------|------------------------|--------------------------------|---------------------|---------------------|---------------------|-----------------|-----------------------------------------|---------|
| <i>M05-2X</i>                      |                        |                                |                     |                     |                     |                 |                                         |         |
| <b><i>m-a1wa</i></b>               |                        |                                |                     |                     |                     |                 |                                         |         |
| CH $\cdots$ OS                     | 0.0113                 | 0.0415                         | -0.0079             | 0.0091              | 0.0012              | -2.48           |                                         | 2.8578  |
| NH $\cdots$ O(w)                   | 0.0223                 | 0.0834                         | -0.0176             | 0.0192              | 0.0016              | -5.52           |                                         | 2.0488  |
| CH <sub>phenyl</sub> $\cdots$ O(w) | 0.0047                 | 0.0167                         | -0.0027             | 0.0034              | 0.0013              | -0.85           | -11.83                                  | 2.8988  |
| OH(w) $\cdots$ NO                  | 0.0234                 | 0.0818                         | -0.0174             | 0.0189              | 0.0015              | -5.46           |                                         | 2.0669  |
| <b><i>m-a1wb</i></b>               |                        |                                |                     |                     |                     |                 |                                         |         |
| CH $\cdots$ OS                     | 0.0114                 | 0.0416                         | -0.0079             | 0.0092              | 0.0013              | -2.48           |                                         | 2.8267  |
| NH $\cdots$ O(w)                   | 0.0209                 | 0.0789                         | -0.0162             | 0.0179              | 0.0017              | -5.08           |                                         | 2.0701  |
| CH <sub>phenyl</sub> $\cdots$ O(w) | 0.0075                 | 0.0277                         | -0.0047             | 0.0058              | 0.0011              | -1.47           | -12.61                                  | 2.5396  |
| OH(w) $\cdots$ OS                  | 0.0230                 | 0.0947                         | -0.0193             | 0.0215              | 0.0022              | -6.06           |                                         | 2.0127  |
| <i>M06-2X</i>                      |                        |                                |                     |                     |                     |                 |                                         |         |
| <b><i>m-a1wa</i></b>               |                        |                                |                     |                     |                     |                 |                                         |         |
| CH $\cdots$ OS                     | 0.0112                 | 0.0413                         | -0.0078             | 0.0090              | 0.0012              | -2.45           |                                         | 2.8319  |
| NH $\cdots$ O(w)                   | 0.0228                 | 0.0883                         | -0.0182             | 0.0201              | 0.0019              | -5.71           |                                         | 2.0338  |
| CH <sub>phenyl</sub> $\cdots$ O(w) | 0.0053                 | 0.0183                         | -0.0030             | 0.0038              | 0.0008              | -0.94           | -12.23                                  | 2.8629  |
| OH(w) $\cdots$ NO                  | 0.0234                 | 0.0850                         | -0.0178             | 0.0195              | 0.0017              | -5.58           |                                         | 2.0601  |
| <b><i>m-a1wb</i></b>               |                        |                                |                     |                     |                     |                 |                                         |         |
| CH $\cdots$ OS                     | 0.0114                 | 0.0422                         | -0.0079             | 0.0092              | 0.0013              | -2.48           |                                         | 2.7672  |
| NH $\cdots$ O(w)                   | 0.0214                 | 0.0832                         | -0.0167             | 0.0188              | 0.0021              | -5.24           |                                         | 2.0542  |
| CH <sub>phenyl</sub> $\cdots$ O(w) | 0.0082                 | 0.0298                         | -0.0051             | 0.0063              | 0.0012              | -1.60           | -12.86                                  | 2.5037  |
| OH(w) $\cdots$ OS                  | 0.0227                 | 0.0968                         | -0.0192             | 0.0217              | 0.0025              | -6.02           |                                         | 2.0149  |
| <i>B3LYP</i>                       |                        |                                |                     |                     |                     |                 |                                         |         |
| <b><i>m-a1wa</i></b>               |                        |                                |                     |                     |                     |                 |                                         |         |
| CH $\cdots$ OS                     | 0.0108                 | 0.0394                         | -0.0071             | 0.0085              | 0.0014              | -2.23           |                                         | 2.6948  |
| NH $\cdots$ O(w)                   | 0.0231                 | 0.0780                         | -0.0169             | 0.0182              | 0.0013              | -5.30           | -10.98                                  | 2.0405  |
| OH(w) $\cdots$ NO                  | 0.0252                 | 0.0800                         | -0.0181             | 0.0191              | 0.0010              | -5.68           |                                         | 2.0407  |
| <b><i>m-a1wb</i></b>               |                        |                                |                     |                     |                     |                 |                                         |         |
| CH $\cdots$ OS                     | 0.0100                 | 0.0365                         | -0.0065             | 0.0078              | 0.0013              | -2.04           |                                         | 2.7633  |
| NH $\cdots$ O(w)                   | 0.0207                 | 0.0720                         | -0.0148             | 0.0164              | 0.0016              | -4.64           |                                         | 2.0802  |
| CH <sub>phenyl</sub> $\cdots$ O(w) | 0.0043                 | 0.0161                         | -0.0026             | 0.0033              | 0.0007              | -0.82           | -10.70                                  | 2.7952  |
| OH(w) $\cdots$ OS                  | 0.0218                 | 0.0841                         | -0.0167             | 0.0189              | 0.0022              | -5.24           |                                         | 2.0354  |

Table S21: Summary of the QTAIM results regarding the non-covalent interactions in the two isomers of the amido tautomers of **sulfisoxazole-H<sub>2</sub>O** studied further with IQA analysis. Atomic units are used except for the energy of the hydrogen bonds (kcal/mol). The wave functions were derived using **6-311++G(3df,3p)** as basis set. All structures were fully optimized at the same level of theory

| Interaction                               | $\rho(\mathbf{r}_{\text{BCP}})$ | $\nabla^2\rho(\mathbf{r}_{\text{BCP}})$ | $V(\mathbf{r}_{\text{BCP}})$ | $G(\mathbf{r}_{\text{BCP}})$ | $H(\mathbf{r}_{\text{BCP}})$ | $E_{\text{HB}}$ | $\sum_i E_{\text{HB}}^{\text{inter},i}$ | BPL (Å) |
|-------------------------------------------|---------------------------------|-----------------------------------------|------------------------------|------------------------------|------------------------------|-----------------|-----------------------------------------|---------|
| <b>M05-2X</b>                             |                                 |                                         |                              |                              |                              |                 |                                         |         |
| <b><i>i-a1wb</i></b>                      |                                 |                                         |                              |                              |                              |                 |                                         |         |
| methylCH...OS                             | 0.0081                          | 0.0313                                  | -0.0055                      | 0.0067                       | 0.0012                       | -1.73           |                                         | 3.1396  |
| NH...O(w)                                 | 0.0213                          | 0.0807                                  | -0.0167                      | 0.0184                       | 0.0017                       | -5.24           |                                         | 2.0583  |
| CH <sub>phenyl</sub> ...O(w)              | 0.0058                          | 0.0211                                  | -0.0036                      | 0.0044                       | 0.0008                       | -1.13           | -12.61                                  | 2.6909  |
| OH(w)...OS                                | 0.0236                          | 0.0962                                  | -0.0199                      | 0.0220                       | 0.0021                       | -6.24           |                                         | 2.0007  |
| <b><i>i-a1wa</i></b>                      |                                 |                                         |                              |                              |                              |                 |                                         |         |
| methylCH...OS <sup>b</sup>                | 0.0083                          | 0.0323                                  | -0.0057                      | 0.0069                       | 0.0012                       | -1.79           |                                         | 3.4132  |
| NH...O(w)                                 | 0.0212                          | 0.0808                                  | -0.0164                      | 0.0183                       | 0.0019                       | -5.15           |                                         | 2.0626  |
| CH <sub>phenyl</sub> ...O(w)              | 0.0044                          | 0.0165                                  | -0.0024                      | 0.0033                       | 0.0009                       | -0.75           | -9.19                                   | 3.3239  |
| OH(w)...ON                                | 0.0144                          | 0.0608                                  | -0.0105                      | 0.0128                       | 0.0023                       | -3.29           |                                         | 2.2363  |
| <b>M06-2X</b>                             |                                 |                                         |                              |                              |                              |                 |                                         |         |
| <b><i>i-a1wb</i></b>                      |                                 |                                         |                              |                              |                              |                 |                                         |         |
| methylCH...OS <sup>b</sup>                | 0.0086                          | 0.0331                                  | -0.0059                      | 0.0071                       | 0.0012                       | -1.85           |                                         | 3.3986  |
| NH...O(w)                                 | 0.0218                          | 0.0851                                  | -0.0173                      | 0.0193                       | 0.0020                       | -5.43           |                                         | 2.0423  |
| CH <sub>phenyl</sub> ...O(w)              | 0.0066                          | 0.0233                                  | -0.0041                      | 0.0050                       | 0.0009                       | -1.29           | -12.90                                  | 2.6369  |
| OH(w)...OS                                | 0.0231                          | 0.0980                                  | -0.0197                      | 0.0221                       | 0.0024                       | -6.18           |                                         | 2.0056  |
| <b><i>i-a1wa</i></b>                      |                                 |                                         |                              |                              |                              |                 |                                         |         |
| methylCH...OS <sup>b</sup>                | 0.0087                          | 0.0339                                  | -0.0060                      | 0.0073                       | 0.0013                       | -1.88           |                                         | 3.3299  |
| NH...O(w)                                 | 0.0220                          | 0.0868                                  | -0.0173                      | 0.0195                       | 0.0022                       | -5.43           |                                         | 2.0438  |
| CH <sub>phenyl</sub> ...O(w) <sup>b</sup> | 0.0055                          | 0.0201                                  | -0.0032                      | 0.0041                       | 0.0009                       | -1.00           | -9.94                                   | 3.5917  |
| OH(w)...ON                                | 0.0151                          | 0.0647                                  | -0.0112                      | 0.0137                       | 0.0025                       | -3.51           |                                         | 2.2094  |
| <b>B3LYP</b>                              |                                 |                                         |                              |                              |                              |                 |                                         |         |
| <b><i>i-a1wb</i></b>                      |                                 |                                         |                              |                              |                              |                 |                                         |         |
| methylCH...OS                             | 0.0064                          | 0.0236                                  | -0.0039                      | 0.0049                       | 0.0010                       | -1.22           |                                         | 2.9449  |
| NH...O(w)                                 | 0.0212                          | 0.0736                                  | -0.0153                      | 0.0168                       | 0.0015                       | -4.80           |                                         | 2.0694  |
| CH <sub>phenyl</sub> ...O(w)              | 0.0033                          | 0.0131                                  | -0.0019                      | 0.0026                       | 0.0007                       | -0.60           | -10.86                                  | 2.9401  |
| OH(w)...OS                                | 0.0225                          | 0.0856                                  | -0.0174                      | 0.0194                       | 0.0020                       | -5.46           |                                         | 2.0194  |
| <b><i>i-a1wa</i></b>                      |                                 |                                         |                              |                              |                              |                 |                                         |         |
| methylCH...OS                             | 0.0072                          | 0.0269                                  | -0.0046                      | 0.0056                       | 0.0010                       | -1.44           |                                         | 2.9230  |
| NH...O(w)                                 | 0.0219                          | 0.0763                                  | -0.0159                      | 0.0175                       | 0.0016                       | -4.99           | -7.78                                   | 2.0519  |
| OH(w)...ON                                | 0.0132                          | 0.0517                                  | -0.0089                      | 0.0109                       | 0.0020                       | -2.79           |                                         | 2.2835  |

<sup>b</sup> bond path goes to C atom

# IQF results with B3LYP

Table S22: Summary of the IQF results (kcal/mol) calculated using structures optimized at the B3LYP/6-311++G(3df,3pd) level of theory. The 5-methyl-1,2-oxazole and the 3,4-dimethyl-1,2-oxazole group are abbreviated both with htc

| <b>m-a1wa</b>                           |                  |                 |                 | <b>i-a1wa</b>                           |                  |                 |                 |
|-----------------------------------------|------------------|-----------------|-----------------|-----------------------------------------|------------------|-----------------|-----------------|
| Group $\mathcal{G}$                     | $E_{\text{def}}$ |                 |                 | Group $\mathcal{G}$                     | $E_{\text{def}}$ |                 |                 |
| SO <sub>2</sub>                         | -1.03            |                 |                 | SO <sub>2</sub>                         | -0.77            |                 |                 |
| NH                                      | 4.81             |                 |                 | NH                                      | 4.83             |                 |                 |
| htc                                     | 5.09             |                 |                 | htc                                     | -0.70            |                 |                 |
| (PhNH <sub>2</sub> )                    | -0.27            |                 |                 | (PhNH <sub>2</sub> )                    | -0.08            |                 |                 |
| H <sub>2</sub> O                        | 17.88            |                 |                 | H <sub>2</sub> O                        | 14.06            |                 |                 |
| Groups $\mathcal{G} \cdots \mathcal{H}$ | $E_{\text{int}}$ | $V_{\text{cl}}$ | $V_{\text{xc}}$ | Groups $\mathcal{G} \cdots \mathcal{H}$ | $E_{\text{int}}$ | $V_{\text{cl}}$ | $V_{\text{xc}}$ |
| SO <sub>2</sub> ···H <sub>2</sub> O     | -3.35            | -3.05           | -0.31           | SO <sub>2</sub> ···H <sub>2</sub> O     | -2.94            | -2.61           | -0.33           |
| NH···H <sub>2</sub> O                   | -15.43           | -0.57           | -14.86          | NH···H <sub>2</sub> O                   | -14.25           | -0.29           | -13.96          |
| htc···H <sub>2</sub> O                  | -25.99           | -7.66           | -18.33          | htc···H <sub>2</sub> O                  | -14.40           | -5.30           | -9.10           |
| (PhNH <sub>2</sub> )···H <sub>2</sub> O | -0.88            | -0.38           | -0.50           | (PhNH <sub>2</sub> )···H <sub>2</sub> O | -1.56            | -0.46           | -1.10           |
| SO <sub>2</sub> ···NH                   | 3.57             | 3.86            | -0.30           | SO <sub>2</sub> ···NH                   | 3.03             | 3.71            | -0.67           |
| SO <sub>2</sub> ···(PhNH <sub>2</sub> ) | 0.23             | 0.19            | 0.04            | SO <sub>2</sub> ···(PhNH <sub>2</sub> ) | 0.36             | -0.09           | 0.46            |
| SO <sub>2</sub> ···htc                  | -2.31            | -2.30           | -0.02           | SO <sub>2</sub> ···htc                  | -2.25            | -2.26           | 0.01            |
| NH···(PhNH <sub>2</sub> )               | 0.15             | -0.09           | 0.24            | NH···(PhNH <sub>2</sub> )               | 0.31             | 0.07            | 0.25            |
| NH···htc                                | 8.46             | 10.98           | -2.52           | NH···htc                                | 8.62             | 10.68           | -2.06           |
| (PhNH <sub>2</sub> )···htc              | 0.11             | 0.05            | 0.04            | (PhNH <sub>2</sub> )···htc              | 0.07             | 0.02            | 0.05            |
| $E_{\text{bind}}$                       | -8.96            |                 |                 | $E_{\text{bind}}$                       | -5.67            |                 |                 |
| $\sum E_{\text{HB}}$                    | -10.98           |                 |                 | $\sum E_{\text{HB}}$                    | -7.78            |                 |                 |
| $E_{\text{complex}}$                    | -8.73            |                 |                 | $E_{\text{complex}}$                    | -6.42            |                 |                 |
| <b>m-a1wb</b>                           |                  |                 |                 | <b>i-a1wb</b>                           |                  |                 |                 |
| Group $\mathcal{G}$                     | $E_{\text{def}}$ |                 |                 | Group $\mathcal{G}$                     | $E_{\text{def}}$ |                 |                 |
| SO <sub>2</sub>                         | 2.39             |                 |                 | SO <sub>2</sub>                         | 1.70             |                 |                 |
| NH                                      | 6.40             |                 |                 | NH                                      | 5.41             |                 |                 |
| htc                                     | -1.60            |                 |                 | htc                                     | -2.19            |                 |                 |
| (PhNH <sub>2</sub> )                    | 1.87             |                 |                 | (PhNH <sub>2</sub> )                    | 1.80             |                 |                 |
| H <sub>2</sub> O                        | 17.14            |                 |                 | H <sub>2</sub> O                        | 17.17            |                 |                 |
| Groups $\mathcal{G} \cdots \mathcal{H}$ | $E_{\text{int}}$ | $V_{\text{cl}}$ | $V_{\text{xc}}$ | Groups $\mathcal{G} \cdots \mathcal{H}$ | $E_{\text{int}}$ | $V_{\text{cl}}$ | $V_{\text{xc}}$ |
| SO <sub>2</sub> ···H <sub>2</sub> O     | -22.15           | -7.55           | -14.61          | SO <sub>2</sub> ···H <sub>2</sub> O     | -22.51           | -7.54           | -14.97          |
| NH···H <sub>2</sub> O                   | -15.17           | -1.81           | -13.36          | NH···H <sub>2</sub> O                   | -15.67           | -1.92           | -13.75          |
| htc···H <sub>2</sub> O                  | -1.33            | -0.99           | -0.34           | htc···H <sub>2</sub> O                  | -1.56            | -1.28           | -0.28           |
| (PhNH <sub>2</sub> )···H <sub>2</sub> O | -3.28            | -0.54           | -2.74           | (PhNH <sub>2</sub> )···H <sub>2</sub> O | -2.25            | -0.20           | -2.05           |
| SO <sub>2</sub> ···NH                   | 5.53             | 7.09            | -1.57           | SO <sub>2</sub> ···NH                   | 7.69             | 9.44            | -1.75           |
| SO <sub>2</sub> ···(PhNH <sub>2</sub> ) | 1.83             | 1.57            | 0.25            | SO <sub>2</sub> ···(PhNH <sub>2</sub> ) | 1.46             | 1.24            | 0.23            |
| SO <sub>2</sub> ···htc                  | -1.75            | -1.75           | 0.00            | SO <sub>2</sub> ···htc                  | -2.06            | -2.06           | 0.00            |
| NH···(PhNH <sub>2</sub> )               | -1.15            | -1.48           | 0.33            | NH···(PhNH <sub>2</sub> )               | -1.01            | -1.25           | 0.24            |
| NH···htc                                | 2.70             | 3.00            | -0.30           | NH···htc                                | 3.46             | 3.90            | -0.44           |
| (PhNH <sub>2</sub> )···htc              | 0.61             | 0.61            | 0.01            | (PhNH <sub>2</sub> )···htc              | 0.55             | 0.54            | 0.00            |
| $E_{\text{bind}}$                       | -7.97            |                 |                 | $E_{\text{bind}}$                       | -8.01            |                 |                 |
| $\sum E_{\text{HB}}$                    | -10.70           |                 |                 | $\sum E_{\text{HB}}$                    | -10.86           |                 |                 |
| $E_{\text{complex}}$                    | -7.87            |                 |                 | $E_{\text{complex}}$                    | -7.99            |                 |                 |



# Cartesian coordinates

Table S23: Coordinates (in Å) of the global minimum of SMX (left) and SIX (right)

| (a) <b>m-a1</b> M05-2X/6-311++G(3df,3pd) |           |           | (b) <b>i-a1</b> M05-2X/6-311++G(3df,3pd) |   |           |           |           |
|------------------------------------------|-----------|-----------|------------------------------------------|---|-----------|-----------|-----------|
| C                                        | -3.071399 | -1.519238 | -0.008135                                | S | -0.139815 | 1.966220  | 0.148478  |
| C                                        | -2.055108 | -1.548447 | 0.950862                                 | O | 1.127832  | -0.794774 | -1.578047 |
| C                                        | -1.168188 | -0.499174 | 1.063379                                 | O | 0.553717  | 1.999677  | 1.397047  |
| C                                        | -1.285851 | 0.593460  | 0.216096                                 | O | -0.715711 | 3.136968  | -0.436586 |
| C                                        | -2.292375 | 0.640912  | -0.739378                                | N | 0.983772  | 1.455260  | -0.991198 |
| C                                        | -3.178146 | -0.407517 | -0.850524                                | N | 1.801598  | -1.943135 | -1.227663 |
| H                                        | -1.970453 | -2.399594 | 1.608519                                 | N | -4.058421 | -2.426929 | 0.204288  |
| H                                        | -0.394198 | -0.510821 | 1.812574                                 | C | -1.337543 | 0.701066  | 0.218276  |
| H                                        | -2.384367 | 1.507189  | -1.374296                                | C | 1.562622  | 0.206825  | -0.798493 |
| H                                        | -3.964724 | -0.374156 | -1.588278                                | C | 2.494190  | -0.228521 | 0.076777  |
| S                                        | -0.134317 | 1.903346  | 0.314927                                 | C | 2.591696  | -1.616211 | -0.248856 |
| O                                        | -0.734353 | 3.086945  | -0.215679                                | C | -1.154431 | -0.372343 | 1.079886  |
| O                                        | 0.472560  | 1.868897  | 1.609142                                 | C | -2.431271 | 0.745549  | -0.635325 |
| N                                        | 1.070412  | 1.538975  | -0.772030                                | C | 3.260198  | 0.533349  | 1.100410  |
| N                                        | -3.931568 | -2.582498 | -0.146567                                | C | -2.064893 | -1.405838 | 1.082587  |
| H                                        | -4.010282 | -3.212104 | 0.629281                                 | C | -3.344081 | -0.285413 | -0.627031 |
| H                                        | -4.792629 | -2.414739 | -0.631357                                | C | -3.171979 | -1.378977 | 0.228506  |
| C                                        | 1.813342  | 0.370287  | -0.623469                                | C | 3.482407  | -2.626557 | 0.382800  |
| C                                        | 3.067497  | -1.242600 | 0.101867                                 | H | 0.633692  | 1.610900  | -1.926040 |
| N                                        | 2.037587  | -0.378230 | -1.661270                                | H | -0.307272 | -0.381910 | 1.745730  |
| H                                        | 0.784381  | 1.715861  | -1.724514                                | H | -2.565968 | 1.595041  | -1.285081 |
| O                                        | 2.844351  | -1.396811 | -1.208431                                | H | 3.182667  | 1.597889  | 0.910956  |
| C                                        | 2.441758  | -0.130752 | 0.548948                                 | H | 2.869685  | 0.353230  | 2.098808  |
| C                                        | 3.920094  | -2.260502 | 0.758923                                 | H | 4.307022  | 0.241233  | 1.084693  |
| H                                        | 3.470453  | -3.245094 | 0.666264                                 | H | -1.927004 | -2.244768 | 1.746694  |
| H                                        | 4.899025  | -2.289500 | 0.289087                                 | H | -4.199593 | -0.255143 | -1.283678 |
| H                                        | 4.036947  | -2.019729 | 1.808556                                 | H | 3.274747  | -2.702594 | 1.446901  |
| H                                        | 2.429689  | 0.290597  | 1.532732                                 | H | 3.328456  | -3.592943 | -0.082828 |
|                                          |           |           |                                          | H | 4.523760  | -2.336997 | 0.267440  |
|                                          |           |           |                                          | H | -4.060978 | -3.049528 | 0.989319  |
|                                          |           |           |                                          | H | -4.959008 | -2.262829 | -0.203074 |

Table S24: Coordinates (in Å) of the two isomers of SMX and SIX presented in more detail in the main text

| (a) <b>m-a1wa</b> M05-2X/6-311++G(3df,3pd) |           |           | (b) <b>m-a1wb</b> M05-2X/6-311++G(3df,3pd) |   |           |           |           |
|--------------------------------------------|-----------|-----------|--------------------------------------------|---|-----------|-----------|-----------|
| C                                          | -3.090071 | 1.457331  | 0.205557                                   | C | -2.977776 | -1.759268 | -0.292704 |
| C                                          | -2.404938 | 1.532682  | -1.008659                                  | C | -2.237141 | -1.896376 | 0.883126  |
| C                                          | -1.494039 | 0.556947  | -1.359506                                  | C | -1.363211 | -0.904739 | 1.278930  |
| C                                          | -1.267209 | -0.508021 | -0.503062                                  | C | -1.228169 | 0.237385  | 0.506407  |
| C                                          | -1.936105 | -0.597221 | 0.711932                                   | C | -1.952384 | 0.389754  | -0.670513 |
| C                                          | -2.838698 | 0.380346  | 1.063331                                   | C | -2.819294 | -0.602854 | -1.065726 |
| H                                          | -2.590660 | 2.362341  | -1.673064                                  | H | -2.349738 | -2.787133 | 1.481412  |
| H                                          | -0.964219 | 0.604720  | -2.296246                                  | H | -0.791408 | -1.000749 | 2.186721  |
| H                                          | -1.742513 | -1.424713 | 1.376207                                   | H | -1.831946 | 1.277648  | -1.272172 |
| H                                          | -3.356710 | 0.321436  | 2.007911                                   | H | -3.380683 | -0.495216 | -1.980746 |
| S                                          | -0.098218 | -1.740587 | -0.917952                                  | S | -0.108753 | 1.490122  | 0.984645  |
| O                                          | -0.622402 | -3.027627 | -0.587645                                  | O | -0.734834 | 2.773678  | 0.815583  |
| O                                          | 0.412181  | -1.447360 | -2.222500                                  | O | 0.463706  | 1.122939  | 2.242004  |
| N                                          | 1.148945  | -1.526151 | 0.159365                                   | N | 1.095144  | 1.477641  | -0.144787 |
| N                                          | -3.967120 | 2.451715  | 0.577467                                   | N | -3.817706 | -2.764504 | -0.711796 |
| H                                          | -4.335748 | 3.027548  | -0.155742                                  | H | -4.119708 | -3.425080 | -0.021107 |
| H                                          | -4.633930 | 2.222841  | 1.290275                                   | H | -4.520163 | -2.521448 | -1.384236 |
| C                                          | 1.783378  | -0.293020 | 0.221106                                   | C | 1.835617  | 0.315988  | -0.347504 |
| C                                          | 2.811097  | 1.569079  | -0.218391                                  | C | 3.026918  | -1.482324 | -0.123737 |
| N                                          | 2.065640  | 0.232928  | 1.379338                                   | N | 2.156246  | -0.031490 | -1.557586 |
| H                                          | 0.913497  | -1.901805 | 1.076453                                   | H | 0.822181  | 1.966048  | -0.995969 |
| O                                          | 2.728145  | 1.406654  | 1.107493                                   | O | 2.923534  | -1.166326 | -1.419014 |
| C                                          | 2.232132  | 0.524638  | -0.851280                                  | C | 2.358794  | -0.578259 | 0.626839  |
| C                                          | 3.494311  | 2.792631  | -0.697731                                  | C | 3.818529  | -2.689676 | 0.208884  |
| H                                          | 2.971303  | 3.677317  | -0.345660                                  | H | 3.375573  | -3.568427 | -0.251353 |
| H                                          | 4.512009  | 2.826603  | -0.319610                                  | H | 4.833814  | -2.587139 | -0.163371 |
| H                                          | 3.516589  | 2.799632  | -1.780578                                  | H | 3.845996  | -2.826543 | 1.283081  |
| H                                          | 2.139654  | 0.335914  | -1.900643                                  | H | 2.258002  | -0.526336 | 1.690954  |
| O                                          | 0.555301  | -1.533758 | 3.028883                                   | O | -0.448380 | 3.281373  | -1.901362 |
| H                                          | 1.114399  | -0.759460 | 2.870212                                   | H | -0.684016 | 3.535551  | -1.000131 |
| H                                          | 0.970597  | -2.028056 | 3.734897                                   | H | -0.157158 | 4.074246  | -2.349930 |

Table S24 (*continued*): Coordinates (in Å) of the two isomers of SMX and SIX presented in more detail in the main text

| (c) <b>i-a1wb</b> M05-2X/6-311++G(3df,3pd) |           |           |           | (d) <b>i-a1wa</b> M05-2X/6-311++G(3df,3pd) |           |            |           |
|--------------------------------------------|-----------|-----------|-----------|--------------------------------------------|-----------|------------|-----------|
| S                                          | 0.156189  | 1.606981  | -0.829241 | C                                          | -3.119547 | 1.467645   | -0.372948 |
| O                                          | -1.136465 | -0.505671 | 1.607692  | C                                          | -2.060245 | 1.542417   | -1.281387 |
| O                                          | -0.568470 | 1.349504  | -2.032792 | C                                          | -1.150043 | 0.511709   | -1.379602 |
| O                                          | 0.811499  | 2.871181  | -0.623199 | C                                          | -1.290490 | -0.6063271 | -0.570046 |
| N                                          | -0.926634 | 1.497313  | 0.435241  | C                                          | -2.334359 | -0.696572  | 0.341222  |
| N                                          | -1.870165 | -1.669579 | 1.599223  | C                                          | -3.243479 | 0.333409   | 0.436389  |
| N                                          | 3.845762  | -2.860346 | 0.199640  | H                                          | -1.957982 | 2.415312   | -1.907250 |
| C                                          | 1.294964  | 0.311492  | -0.580138 | H                                          | -0.335842 | 0.557341   | -2.083973 |
| C                                          | -1.561905 | 0.271987  | 0.601079  | H                                          | -2.424496 | -1.569797  | 0.966386  |
| C                                          | -2.545882 | -0.335017 | -0.097418 | H                                          | -4.057873 | 0.270786   | 1.141419  |
| C                                          | -2.686785 | -1.577637 | 0.592390  | S                                          | -0.087242 | -1.870430  | -0.619474 |
| C                                          | 1.148169  | -0.874309 | -1.284564 | O                                          | -0.674144 | -3.108868  | -0.215555 |
| C                                          | 2.286921  | 0.448886  | 0.383124  | O                                          | 0.647761  | -1.742547  | -1.839490 |
| C                                          | -3.324150 | 0.162699  | -1.264332 | N                                          | 0.977692  | -1.493212  | 0.620692  |
| C                                          | 2.005923  | -1.924192 | -1.035911 | N                                          | -4.005429 | 2.512704   | -0.246133 |
| C                                          | 3.142518  | -0.600204 | 0.628603  | H                                          | -4.059212 | 3.159572   | -1.009915 |
| C                                          | 3.015568  | -1.802400 | -0.077372 | H                                          | -4.887581 | 2.312057   | 0.185459  |
| C                                          | -3.642429 | -2.674801 | 0.282102  | C                                          | 1.551318  | -0.230546  | 0.578567  |
| H                                          | -0.524435 | 1.896235  | 1.282549  | C                                          | 2.584063  | 1.652364   | 0.271726  |
| H                                          | 0.370051  | -0.958063 | -2.024997 | H                                          | 0.550409  | -1.708566  | 1.519633  |
| H                                          | 2.380421  | 1.369475  | 0.936915  | C                                          | 2.511473  | 0.306785   | -0.203719 |
| H                                          | -3.191006 | 1.232879  | -1.374901 | C                                          | 3.490280  | 2.726657   | -0.215480 |
| H                                          | -2.989997 | -0.302834 | -2.188036 | H                                          | 3.314270  | 3.638187   | 0.343513  |
| H                                          | -4.381268 | -0.055069 | -1.135011 | H                                          | 4.528384  | 2.427967   | -0.094623 |
| H                                          | 1.898514  | -2.849754 | -1.579665 | H                                          | 3.319444  | 2.913670   | -1.272351 |
| H                                          | 3.914350  | -0.502944 | 1.376065  | C                                          | 3.327122  | -0.334361  | -1.270763 |
| H                                          | -3.479136 | -3.045717 | -0.726370 | H                                          | 3.254142  | -1.413505  | -1.199125 |
| H                                          | -3.510100 | -3.486179 | 0.988243  | H                                          | 2.974158  | -0.051293  | -2.259040 |
| H                                          | -4.665941 | -2.313521 | 0.341849  | H                                          | 4.369077  | -0.038028  | -1.180514 |
| H                                          | 3.907207  | -3.591699 | -0.482385 | O                                          | 1.076775  | 0.687365   | 1.444314  |
| H                                          | 4.702034  | -2.663119 | 0.681037  | N                                          | 1.755040  | 1.873117   | 1.246922  |
| O                                          | 0.815958  | 3.154802  | 2.140426  | O                                          | -0.474193 | -1.069761  | 3.153971  |
| H                                          | 0.948405  | 3.470411  | 1.237297  | H                                          | -0.205383 | -0.161689  | 2.986300  |
| H                                          | 0.601488  | 3.918916  | 2.674133  | H                                          | -0.282921 | -1.241988  | 4.075625  |

## References

- (1) TURBOMOLE V6.6 2014, a development of University of Karlsruhe and Forschungszentrum Karlsruhe GmbH, 1989-2007, TURBOMOLE GmbH, since 2007; available from <http://www.turbomole.com>.
- (2) G. P. Bettinetti, F. Giordano, A. La Manna, G. Giuseppetti and C. Tadini, *Cryst. Struct. Commun.*, 1982, **11**, 821–828.
- (3) C. P. Price, A. L. Grzesiak and A. J. Matzger, *J. Am. Chem. Soc.*, 2005, **127**, 5512–5517.
- (4) B. V. Noumerov, *Mon. Not. R. Astron. Soc.*, 1924, **84**, 592–601.
- (5) I. N. Levine, *Quantum Chemistry*, Pearson Education, Upper Saddle River, NJ, 7th edn, 2014.
- (6) J. C. D. Brand, D. R. Williams and T. J. Cook, *J. Mol. Spectrosc.*, 1966, **20**, 359–380.
- (7) D. A. Chernoff and S. A. Rice, *J. Chem. Phys.*, 1979, **70**, 2511–2520.
